# Supplementary material for: Integrative transcriptomic and metabolomic analyses unveil tanshinone biosynthesis in Salvia miltiorrhiza root under N starvation stress
Source: PLoS One. 2022 Aug 25;17(8):e0273495. doi: 10.1371/journal.pone.0273495 (PMC9409544; doi:10.1371/journal.pone.0273495)
Supplement: S9 Table — (XLSX) [file pone.0273495.s019.xlsx]

## Sheet: Kegg top20 enrichment45d
S9 Table Top 20 KEGG enrichment pathways involved in N0 vs. Nf, Nl vs. Nf, and N0 vs. Nl at 45, 60, and 75 days after transplanting (DAT)
Top 20 KEGG enrichment pathways involved in N0 vs.Nf, Nl vs.Nf and N0 vs.Nl at 45 DAT
N0 vs. Nf up/down regulated
ID	#Pathway	DEG	DEG_all	Gene	Gene_all	p-value	FDR	GeneID	Cluster_frequency(%)	Genome_frequency(%)	Enrichment_score
ko00195	Photosynthesis	29	560	190	19732	2.0406e-14	3.57105e-12	comp62405_c1_seq4_8,CL2Contig2,comp59136_c1_seq3_4,CL5608Contig3,comp72570_c0_seq1_9,comp57038_c1_seq14_7,CL6244Contig1,CL7678Contig1,comp46343_c0_seq1_8,CL2Contig224,CL2Contig118,comp68149_c0_seq5_9,CL20767Contig1,CL2Contig252,CL2Contig141,CL35515Contig1,CL2Contig228,comp62844_c0_seq9_8,comp33365_c0_seq1_2,comp71384_c0_seq5_5,CL2Contig295,comp58552_c1_seq5_8,comp38108_c0_seq1_7,comp59340_c3_seq8…	5.17857	0.962903	5.37808
ko00910	Nitrogen metabolism	17	560	166	19732	1.22061e-06	0.000106803	CL11423Contig2,comp54853_c0_seq10_7,CL14155Contig1,comp66490_c0_seq1_5,comp50972_c0_seq14_3,CL4435Contig1,comp47184_c0_seq1_3,comp56551_c1_seq2_4,CL18665Contig2,CL1925Contig1,CL1685Contig4,CL25112Contig1,CL4239Contig2,CL1265Contig4,comp68113_c0_seq21_5,comp43382_c0_seq1_1,CL4435Contig2	3.03571	0.841273	3.60848
ko01200	Carbon metabolism	55	560	1104	19732	1.84917e-05	0.00107868	comp48357_c0_seq1_8,CL6263Contig3,comp38777_c0_seq1_7,CL8208Contig1,CL599Contig3,CL59624Contig1,CL14751Contig2,CL1354Contig3,comp56905_c0_seq2_7,comp54014_c0_seq1_1,comp47184_c0_seq1_3,comp42333_c0_seq2_9,CL331Contig3,CL10790Contig1,CL10919Contig2,comp55130_c1_seq2_7,CL2Contig290,comp55678_c0_seq7_9,CL24909Contig1,CL36809Contig1,comp74628_c0_seq2_5,comp52595_c1_seq1_1,CL14751Contig1,CL1354Contig2…	9.82143	5.59497	1.7554
ko01230	Biosynthesis of amino acids	47	560	936	19732	5.73732e-05	0.00251008	comp38777_c0_seq1_7,CL8208Contig1,CL630Contig2,comp49536_c1_seq7_2,CL14155Contig1,CL14751Contig2,comp43619_c0_seq1_8,CL1354Contig3,comp56905_c0_seq2_7,comp54014_c0_seq1_1,CL17520Contig1,CL8042Contig1,comp42333_c0_seq2_9,comp72453_c0_seq4_5,CL1719Contig5,CL3Contig28,CL24909Contig1,comp58866_c0_seq2_8,CL6229Contig2,CL36809Contig1,CL1827Contig2,comp52595_c1_seq1_1,CL14751Contig1,CL9577Contig1,CL1354…	8.39286	4.74356	1.76931
ko00300	Lysine biosynthesis	6	560	45	19732	0.000254154	0.00780336	CL630Contig2,CL8042Contig1,comp47399_c0_seq1_3,comp43950_c0_seq10_2,CL561Contig3,CL630Contig6	1.07143	0.228056	4.6981
ko00940	Phenylpropanoid biosynthesis	23	560	383	19732	0.000267544	0.00780336	CL1374Contig3,comp68852_c0_seq4_9,comp46060_c0_seq1_1,CL13321Contig1,comp50646_c0_seq2_7,comp57701_c1_seq2_8,comp54845_c0_seq2_8,comp65024_c0_seq1_5,CL52872Contig1,CL2211Contig2,comp48742_c0_seq1_1,CL13039Contig1,comp61995_c1_seq10_8,CL2211Contig5,CL1116Contig4,comp62055_c1_seq1_8,comp68920_c3_seq31_6,CL93Contig2,CL176Contig3,CL1Contig1216,CL767Contig3,CL134Contig3,CL71Contig2	4.10714	1.94101	2.11598
ko00900	Terpenoid backbone biosynthesis	16	560	244	19732	0.000635067	0.0149344	CL16608Contig1,CL4842Contig1,comp60047_c1_seq14_6,CL1282Contig2,comp59962_c0_seq1_4,CL10790Contig1,comp47624_c0_seq1_4,CL540Contig1,CL8090Contig1,comp63666_c1_seq3_9,CL35976Contig1,comp54258_c0_seq3_4,CL589Contig4,CL28921Contig1,CL1282Contig1,comp45317_c0_seq4_1	2.85714	1.23657	2.31054
ko00471	D-Glutamine and D-glutamate metabolism	3	560	15	19732	0.000682717	0.0149344	CL4239Contig2,CL1265Contig4,comp43382_c0_seq1_1	0.535714	0.0760186	7.04714
ko00261	Monobactam biosynthesis	5	560	41	19732	0.000982671	0.0191075	CL630Contig2,CL8042Contig1,comp47399_c0_seq1_3,comp43950_c0_seq10_2,CL630Contig6	0.892857	0.207784	4.29704
ko00520	Amino sugar and nucleotide sugar metabolism	24	560	456	19732	0.00139648	0.0244384	comp45411_c0_seq3_8,CL62219Contig1,CL1Contig226,comp57242_c0_seq3_4,CL81573Contig1,comp44180_c0_seq5_1,CL244Contig2,comp35095_c0_seq1_7,CL15564Contig1,CL3491Contig1,CL1670Contig1,CL18395Contig1,CL1Contig1129,CL61122Contig1,comp26590_c0_seq1_2,CL29124Contig1,CL25767Contig1,comp40413_c0_seq1_4,CL12697Contig1,CL17796Contig2,CL12480Contig1,CL21466Contig1,CL900Contig3,CL12481Contig1	4.28571	2.31097	1.85451
ko00980	Metabolism of xenobiotics by cytochrome P450	11	560	156	19732	0.00168324	0.0265069	CL7907Contig1,CL3736Contig2,comp70291_c0_seq7_9,CL39425Contig1,comp54554_c0_seq1_4,comp46456_c2_seq1_2,CL2313Contig2,CL3716Contig3,CL8Contig1,CL1Contig1589,CL57082Contig1	1.96429	0.790594	2.48457
ko00710	Carbon fixation in photosynthetic organisms	18	560	316	19732	0.00181762	0.0265069	comp48357_c0_seq1_8,CL6263Contig3,comp38777_c0_seq1_7,comp56905_c0_seq2_7,comp54014_c0_seq1_1,comp55130_c1_seq2_7,CL2Contig290,CL24909Contig1,CL36809Contig1,CL3016Contig1,comp44736_c0_seq1_8,comp63000_c0_seq1_5,CL674Contig3,CL3435Contig3,CL10941Contig1,CL14102Contig1,CL22100Contig1,comp46039_c1_seq12_3	3.21429	1.60146	2.0071
ko00523	Polyketide sugar unit biosynthesis	1	560	3	19732	0.00236665	0.0305938	CL1Contig226	0.178571	0.0152037	11.7452
ko00400	Phenylalanine, tyrosine and tryptophan biosynthesis	10	560	142	19732	0.00244751	0.0305938	comp49536_c1_seq7_2,comp43619_c0_seq1_8,CL17520Contig1,CL3Contig28,CL6229Contig2,CL9577Contig1,CL1085Contig4,comp37792_c0_seq1_1,CL45690Contig1,CL299Contig4	1.78571	0.719643	2.48139
ko00480	Glutathione metabolism	17	560	305	19732	0.0028921	0.0337412	CL7907Contig1,CL3867Contig3,CL3736Contig2,CL10919Contig2,CL39425Contig1,comp54554_c0_seq1_4,CL17243Contig1,CL3716Contig3,CL56569Contig1,CL8Contig1,CL3651Contig1,comp51696_c1_seq8_4,comp73684_c2_seq2_5,CL1Contig1589,CL57082Contig1,CL10919Contig1,CL62567Contig1	3.03571	1.54571	1.96396
ko00730	Thiamine metabolism	4	560	37	19732	0.00372145	0.0351905	CL1282Contig2,comp63666_c1_seq3_9,CL18960Contig1,CL1282Contig1	0.714286	0.187513	3.80927
ko00460	Cyanoamino acid metabolism	10	560	150	19732	0.00373684	0.0351905	CL1374Contig3,CL1354Contig3,CL1566Contig3,comp47184_c0_seq1_3,comp57701_c1_seq2_8,comp54845_c0_seq2_8,CL1354Contig2,CL1685Contig4,CL24739Contig1,CL134Contig3	1.78571	0.760186	2.34905
ko00260	Glycine, serine and threonine metabolism	16	560	289	19732	0.00385714	0.0351905	CL8208Contig1,CL630Contig2,CL1354Contig3,CL8042Contig1,CL1354Contig2,comp47399_c0_seq1_3,CL24739Contig1,CL10230Contig1,CL6414Contig2,CL1Contig1652,CL5334Contig1,CL1Contig1906,comp43950_c0_seq10_2,CL1969Contig3,CL561Contig3,CL630Contig6	2.85714	1.46463	1.95077
ko00791	Atrazine degradation	2	560	12	19732	0.00413083	0.0351905	comp48874_c1_seq2_3,comp44721_c0_seq13_2	0.357143	0.0608149	5.87262
ko01051	Biosynthesis of ansamycins	2	560	12	19732	0.00413083	0.0351905	comp54014_c0_seq1_1,CL674Contig3	0.357143	0.0608149	5.87262
N0 vs. Nf up regulated
ID	#Pathway	DEG	DEG_all	Gene	Gene_all	p-value	FDR	GeneID	Cluster_frequency(%)	Genome_frequency(%)	Enrichment_score
ko01230	Biosynthesis of amino acids	33	251	936	19732	3.5384e-08	5.16606e-06	comp38777_c0_seq1_7,CL8208Contig1,comp49536_c1_seq7_2,CL14155Contig1,CL14751Contig2,comp43619_c0_seq1_8,CL1354Contig3,comp56905_c0_seq2_7,comp54014_c0_seq1_1,CL17520Contig1,CL8042Contig1,comp42333_c0_seq2_9,comp72453_c0_seq4_5,CL1719Contig5,CL3Contig28,comp58866_c0_seq2_8,CL6229Contig2,CL1827Contig2,comp52595_c1_seq1_1,CL14751Contig1,CL9577Contig1,CL1354Contig2,CL1085Contig4,comp37792_c0_seq1_1,C…	13.1474	4.74356	2.77163
ko00900	Terpenoid backbone biosynthesis	14	251	244	19732	5.83644e-07	4.2606e-05	CL16608Contig1,CL4842Contig1,comp60047_c1_seq14_6,comp59962_c0_seq1_4,CL10790Contig1,comp47624_c0_seq1_4,CL540Contig1,CL8090Contig1,comp63666_c1_seq3_9,CL35976Contig1,comp54258_c0_seq3_4,CL589Contig4,CL28921Contig1,comp45317_c0_seq4_1	5.57769	1.23657	4.51061
ko00360	Phenylalanine metabolism	10	251	158	19732	5.88177e-06	0.000286246	comp68852_c0_seq4_9,CL17520Contig1,comp46060_c0_seq1_1,comp50646_c0_seq2_7,CL6229Contig2,CL1085Contig4,comp48742_c0_seq1_1,comp62055_c1_seq1_8,CL1Contig1216,CL71Contig2	3.98406	0.80073	4.97554
ko00940	Phenylpropanoid biosynthesis	16	251	383	19732	8.94561e-06	0.000326515	comp68852_c0_seq4_9,comp46060_c0_seq1_1,comp50646_c0_seq2_7,comp65024_c0_seq1_5,CL52872Contig1,CL2211Contig2,comp48742_c0_seq1_1,CL13039Contig1,comp61995_c1_seq10_8,CL2211Contig5,comp62055_c1_seq1_8,comp68920_c3_seq31_6,CL176Contig3,CL1Contig1216,CL767Contig3,CL71Contig2	6.3745	1.94101	3.28412
ko01200	Carbon metabolism	31	251	1104	19732	1.17705e-05	0.000343697	CL6263Contig3,comp38777_c0_seq1_7,CL8208Contig1,CL599Contig3,CL14751Contig2,CL1354Contig3,comp56905_c0_seq2_7,comp54014_c0_seq1_1,comp42333_c0_seq2_9,CL331Contig3,CL10790Contig1,comp74628_c0_seq2_5,comp52595_c1_seq1_1,CL14751Contig1,CL1354Contig2,CL24739Contig1,comp63000_c0_seq1_5,CL10230Contig1,CL674Contig3,CL4239Contig2,CL6414Contig2,CL3435Contig3,CL1970Contig3,CL1265Contig4,comp44651_c0_seq5_1…	12.3506	5.59497	2.20745
ko00400	Phenylalanine, tyrosine and tryptophan biosynthesis	9	251	142	19732	1.41703e-05	0.00034481	comp49536_c1_seq7_2,comp43619_c0_seq1_8,CL17520Contig1,CL3Contig28,CL6229Contig2,CL9577Contig1,CL1085Contig4,comp37792_c0_seq1_1,CL299Contig4	3.58566	0.719643	4.98255
ko00471	D-Glutamine and D-glutamate metabolism	3	251	15	19732	3.12497e-05	0.00065178	CL4239Contig2,CL1265Contig4,comp43382_c0_seq1_1	1.19522	0.0760186	15.7227
ko00140	Steroid hormone biosynthesis	3	251	26	19732	0.000306594	0.00538462	comp70291_c0_seq7_9,comp46456_c2_seq1_2,CL2313Contig2	1.19522	0.131766	9.07079
ko00010	Glycolysis / Gluconeogenesis	16	251	516	19732	0.000348088	0.00538462	CL6263Contig3,comp38777_c0_seq1_7,CL5414Contig1,CL14751Contig2,CL44993Contig2,comp56905_c0_seq2_7,comp42333_c0_seq2_9,CL331Contig3,CL61879Contig1,CL14751Contig1,comp63000_c0_seq1_5,CL3435Contig3,CL1970Contig3,CL1969Contig3,CL561Contig3,comp46039_c1_seq12_3	6.3745	2.61504	2.43763
ko00791	Atrazine degradation	2	251	12	19732	0.00041101	0.00538462	comp48874_c1_seq2_3,comp44721_c0_seq13_2	0.796813	0.0608149	13.1023
ko01051	Biosynthesis of ansamycins	2	251	12	19732	0.00041101	0.00538462	comp54014_c0_seq1_1,CL674Contig3	0.796813	0.0608149	13.1023
ko00630	Glyoxylate and dicarboxylate metabolism	11	251	298	19732	0.000458477	0.00538462	CL14155Contig1,CL1354Contig3,CL10790Contig1,comp52595_c1_seq1_1,CL1354Contig2,CL24739Contig1,CL10230Contig1,CL6414Contig2,comp44651_c0_seq5_1,comp51705_c0_seq12_8,CL5334Contig1	4.38247	1.51024	2.90184
ko00523	Polyketide sugar unit biosynthesis	1	251	3	19732	0.000479452	0.00538462	CL1Contig226	0.398406	0.0152037	26.2045
ko00680	Methane metabolism	9	251	219	19732	0.000517195	0.0053936	CL6263Contig3,CL8208Contig1,CL1354Contig3,comp56905_c0_seq2_7,CL1354Contig2,CL24739Contig1,CL1970Contig3,CL1969Contig3,CL14102Contig1	3.58566	1.10987	3.23069
ko00401	Novobiocin biosynthesis	2	251	17	19732	0.00121201	0.0113183	CL17520Contig1,CL1085Contig4	0.796813	0.0861545	9.24865
ko00260	Glycine, serine and threonine metabolism	10	251	289	19732	0.00124036	0.0113183	CL8208Contig1,CL1354Contig3,CL8042Contig1,CL1354Contig2,CL24739Contig1,CL10230Contig1,CL6414Contig2,CL5334Contig1,CL1969Contig3,CL561Contig3	3.98406	1.46463	2.72019
ko00620	Pyruvate metabolism	12	251	398	19732	0.00184301	0.0158282	CL5414Contig1,CL14751Contig2,comp42333_c0_seq2_9,CL331Contig3,CL10790Contig1,comp74628_c0_seq2_5,CL14751Contig1,comp63000_c0_seq1_5,CL3435Contig3,CL561Contig3,CL14102Contig1,comp46039_c1_seq12_3	4.78088	2.01703	2.37026
ko00950	Isoquinoline alkaloid biosynthesis	5	251	104	19732	0.00214356	0.0173866	comp49400_c0_seq9_1,CL250Contig1,CL17520Contig1,CL6229Contig2,CL1085Contig4	1.99203	0.527063	3.7795
ko00965	Betalain biosynthesis	1	251	6	19732	0.00233738	0.0179609	comp20708_c0_seq2_1	0.398406	0.0304075	13.1023
ko00910	Nitrogen metabolism	6	251	166	19732	0.00543763	0.0386294	CL11423Contig2,CL14155Contig1,CL25112Contig1,CL4239Contig2,CL1265Contig4,comp43382_c0_seq1_1	2.39044	0.841273	2.84145
N0 vs. Nf down regulated
ID	#Pathway	DEG	DEG_all	Gene	Gene_all	p-value	FDR	GeneID	Cluster_frequency(%)	Genome_frequency(%)	Enrichment_score
ko00195	Photosynthesis	27	309	190	19732	2.23136e-19	3.39166e-17	comp62405_c1_seq4_8,CL2Contig2,comp59136_c1_seq3_4,CL5608Contig3,comp72570_c0_seq1_9,comp57038_c1_seq14_7,CL6244Contig1,comp46343_c0_seq1_8,CL2Contig224,CL2Contig118,comp68149_c0_seq5_9,CL20767Contig1,CL2Contig252,CL2Contig141,CL35515Contig1,CL2Contig228,comp62844_c0_seq9_8,comp71384_c0_seq5_5,CL2Contig295,comp58552_c1_seq5_8,comp38108_c0_seq1_7,comp59340_c3_seq8_4,CL9649Contig2,CL21820Contig1,CL…	8.73786	0.962903	9.0745
ko00910	Nitrogen metabolism	11	309	166	19732	1.24769e-05	0.000948242	comp54853_c0_seq10_7,comp66490_c0_seq1_5,comp50972_c0_seq14_3,CL4435Contig1,comp47184_c0_seq1_3,comp56551_c1_seq2_4,CL18665Contig2,CL1925Contig1,CL1685Contig4,comp68113_c0_seq21_5,CL4435Contig2	3.55987	0.841273	4.23153
ko00190	Oxidative phosphorylation	21	309	584	19732	0.000143706	0.00728112	CL2Contig56,CL2Contig189,CL730Contig1,comp49823_c0_seq7_1,CL277Contig1,CL2Contig14,CL2Contig224,CL40445Contig1,comp68149_c0_seq5_9,CL833Contig4,CL2Contig141,CL2Contig228,CL88404Contig1,CL2Contig69,CL2Contig132,CL2Contig265,comp59340_c3_seq8_4,CL53540Contig1,CL2Contig4,CL24819Contig1,comp54433_c2_seq7_7	6.79612	2.95966	2.29625
ko00261	Monobactam biosynthesis	4	309	41	19732	0.000430406	0.0163554	CL630Contig2,comp47399_c0_seq1_3,comp43950_c0_seq10_2,CL630Contig6	1.2945	0.207784	6.23001
ko00300	Lysine biosynthesis	4	309	45	19732	0.000666796	0.0202706	CL630Contig2,comp47399_c0_seq1_3,comp43950_c0_seq10_2,CL630Contig6	1.2945	0.228056	5.67623
ko00480	Glutathione metabolism	12	309	305	19732	0.00110241	0.0242599	CL7907Contig1,CL3867Contig3,CL3736Contig2,CL10919Contig2,CL39425Contig1,comp54554_c0_seq1_4,CL3716Contig3,CL56569Contig1,CL8Contig1,CL3651Contig1,CL10919Contig1,CL62567Contig1	3.8835	1.54571	2.51243
ko00361	Chlorocyclohexane and chlorobenzene degradation	1	309	4	19732	0.00143644	0.0242599	CL17231Contig1	0.323625	0.0202716	15.9644
ko00364	Fluorobenzoate degradation	1	309	4	19732	0.00143644	0.0242599	CL17231Contig1	0.323625	0.0202716	15.9644
ko00623	Toluene degradation	1	309	4	19732	0.00143644	0.0242599	CL17231Contig1	0.323625	0.0202716	15.9644
ko00511	Other glycan degradation	6	309	110	19732	0.00173601	0.0263874	CL38309Contig1,comp55812_c0_seq48_7,CL4718Contig3,CL5148Contig1,comp68810_c0_seq4_9,CL31334Contig2	1.94175	0.55747	3.48314
ko00520	Amino sugar and nucleotide sugar metabolism	15	309	456	19732	0.00235957	0.0300112	comp45411_c0_seq3_8,CL62219Contig1,CL81573Contig1,comp44180_c0_seq5_1,comp35095_c0_seq1_7,CL3491Contig1,CL1670Contig1,CL18395Contig1,CL29124Contig1,CL25767Contig1,comp40413_c0_seq1_4,CL12697Contig1,CL17796Contig2,CL12480Contig1,CL21466Contig1	4.85437	2.31097	2.10058
ko00943	Isoflavonoid biosynthesis	1	309	5	19732	0.0023693	0.0300112	CL2045Contig1	0.323625	0.0253395	12.7715
ko00730	Thiamine metabolism	3	309	37	19732	0.00259248	0.0303121	CL1282Contig2,CL18960Contig1,CL1282Contig1	0.970874	0.187513	5.17764
ko00982	Drug metabolism - cytochrome P450	6	309	147	19732	0.00853876	0.0927065	CL7907Contig1,CL3736Contig2,CL39425Contig1,comp54554_c0_seq1_4,CL3716Contig3,CL8Contig1	1.94175	0.744983	2.60643
ko00460	Cyanoamino acid metabolism	6	309	150	19732	0.00948531	0.0932639	CL1374Contig3,comp47184_c0_seq1_3,comp57701_c1_seq2_8,comp54845_c0_seq2_8,CL1685Contig4,CL134Contig3	1.94175	0.760186	2.5543
ko03020	RNA polymerase	6	309	151	19732	0.00981725	0.0932639	comp69487_c0_seq6_9,CL2Contig197,CL2Contig19,CL2Contig227,CL2Contig207,CL56321Contig1	1.94175	0.765254	2.53739
ko00980	Metabolism of xenobiotics by cytochrome P450	6	309	156	19732	0.0116053	0.103765	CL7907Contig1,CL3736Contig2,CL39425Contig1,comp54554_c0_seq1_4,CL3716Contig3,CL8Contig1	1.94175	0.790594	2.45606
ko00565	Ether lipid metabolism	5	309	132	19732	0.0178173	0.142815	CL1405Contig1,comp57815_c0_seq1_8,CL586Contig2,CL8286Contig1,CL1Contig1632	1.61812	0.668964	2.41885
ko00860	Porphyrin and chlorophyll metabolism	6	309	170	19732	0.0178518	0.142815	comp42202_c0_seq10_2,comp46843_c0_seq4_4,comp61412_c0_seq1_6,CL3171Contig3,CL4Contig58,CL387Contig2	1.94175	0.861545	2.2538
ko00253	Tetracycline biosynthesis	1	309	15	19732	0.0224368	0.169426	comp55678_c0_seq7_9	0.323625	0.0760186	4.25717
Nl vs. Nf up/down regulated
ID	#Pathway	DEG	DEG_all	Gene	Gene_all	p-value	FDR	GeneID	Cluster_frequency(%)	Genome_frequency(%)	Enrichment_score
ko00910	Nitrogen metabolism	15	302	166	19732	5.83558e-09	8.87008e-07	CL11423Contig2,CL10051Contig2,comp54853_c0_seq10_7,CL14155Contig1,comp66490_c0_seq1_5,comp50972_c0_seq14_3,CL4435Contig1,comp58641_c0_seq35_4,comp56551_c1_seq2_4,CL18665Contig2,CL1925Contig1,CL25112Contig1,CL39350Contig1,CL1265Contig4,CL4435Contig2	4.96689	0.841273	5.90401
ko00195	Photosynthesis	14	302	190	19732	2.49266e-07	1.89442e-05	comp62405_c1_seq4_8,comp59136_c1_seq3_4,comp72570_c0_seq1_9,comp57038_c1_seq14_7,CL6244Contig1,CL2Contig224,CL2974Contig1,CL2Contig252,CL2Contig141,CL2Contig228,comp62844_c0_seq9_8,CL2Contig295,comp58552_c1_seq5_8,comp59340_c3_seq8_4	4.63576	0.962903	4.81436
ko00564	Glycerophospholipid metabolism	16	302	441	19732	0.000485945	0.020995	CL34739Contig1,CL5Contig80,comp53193_c0_seq1_1,CL3Contig75,comp48709_c2_seq7_1,comp48849_c1_seq2_1,CL439Contig2,comp69862_c1_seq44_6,CL1405Contig1,comp57815_c0_seq1_8,CL8286Contig1,CL3759Contig1,CL1Contig1632,comp70095_c0_seq18_9,comp46846_c0_seq14_3,comp47182_c0_seq2_1	5.29801	2.23495	2.37053
ko00901	Indole alkaloid biosynthesis	1	302	3	19732	0.000693345	0.020995	CL263Contig4	0.331126	0.0152037	21.7792
ko00791	Atrazine degradation	2	302	12	19732	0.000704887	0.020995	comp48874_c1_seq2_3,comp44721_c0_seq13_2	0.662252	0.0608149	10.8896
ko00565	Ether lipid metabolism	7	302	132	19732	0.000981241	0.020995	CL34739Contig1,comp48709_c2_seq7_1,CL439Contig2,CL1405Contig1,comp57815_c0_seq1_8,CL8286Contig1,CL1Contig1632	2.31788	0.668964	3.46488
ko00361	Chlorocyclohexane and chlorobenzene degradation	1	302	4	19732	0.00137265	0.020995	CL17231Contig1	0.331126	0.0202716	16.3344
ko00364	Fluorobenzoate degradation	1	302	4	19732	0.00137265	0.020995	CL17231Contig1	0.331126	0.0202716	16.3344
ko00623	Toluene degradation	1	302	4	19732	0.00137265	0.020995	CL17231Contig1	0.331126	0.0202716	16.3344
ko04070	Phosphatidylinositol signaling system	12	302	320	19732	0.00138125	0.020995	CL5Contig80,comp53193_c0_seq1_1,CL11894Contig3,CL1078Contig3,CL1Contig223,CL35166Contig2,comp69862_c1_seq44_6,CL12Contig5,CL3190Contig2,comp50666_c0_seq5_7,comp73697_c0_seq2_9,CL4120Contig2	3.97351	1.62173	2.45017
ko00561	Glycerolipid metabolism	12	302	328	19732	0.00171969	0.023763	comp50258_c0_seq2_7,CL5Contig80,comp53193_c0_seq1_1,comp48709_c2_seq7_1,CL33Contig21,comp69862_c1_seq44_6,CL33Contig17,CL61745Contig1,comp54008_c0_seq5_3,comp46846_c0_seq14_3,comp47182_c0_seq2_1,CL561Contig3	3.97351	1.66227	2.39041
ko00965	Betalain biosynthesis	1	302	6	19732	0.00336262	0.0407891	CL5287Contig1	0.331126	0.0304075	10.8896
ko00261	Monobactam biosynthesis	3	302	41	19732	0.00348854	0.0407891	CL630Contig2,CL25082Contig1,CL630Contig6	0.993377	0.207784	4.78081
ko00052	Galactose metabolism	10	302	286	19732	0.00476299	0.0495874	comp52234_c2_seq2_2,comp65896_c2_seq1_9,CL16Contig31,CL3491Contig1,comp65453_c1_seq1_5,comp38397_c0_seq1_1,CL414Contig1,CL1Contig141,CL414Contig6,CL31334Contig2	3.31126	1.44942	2.28454
ko00300	Lysine biosynthesis	3	302	45	19732	0.00489349	0.0495874	CL630Contig2,CL561Contig3,CL630Contig6	0.993377	0.228056	4.35585
ko04142	Lysosome	11	302	342	19732	0.00669565	0.0636087	CL10732Contig1,CL24691Contig1,CL32110Contig1,CL7Contig39,CL40445Contig1,CL7Contig53,CL1301Contig2,comp58193_c0_seq1_9,CL7Contig9,CL7Contig31,CL31334Contig2	3.64238	1.73323	2.10151
ko00480	Glutathione metabolism	10	302	305	19732	0.00759959	0.0679493	CL7907Contig1,CL3867Contig3,CL10919Contig2,CL3716Contig3,CL56569Contig1,CL38475Contig1,CL3651Contig1,comp73684_c2_seq2_5,CL10919Contig1,CL62567Contig1	3.31126	1.54571	2.14222
ko00190	Oxidative phosphorylation	16	302	584	19732	0.00886075	0.0748241	CL2Contig189,CL10732Contig1,comp49823_c0_seq7_1,comp50370_c2_seq4_2,CL2Contig14,CL23759Contig1,CL2Contig224,CL40445Contig1,CL2Contig141,CL2Contig228,CL2Contig69,comp59340_c3_seq8_4,CL64Contig9,comp45913_c0_seq2_3,CL4Contig20,comp54433_c2_seq7_7	5.29801	2.95966	1.79008
ko03070	Bacterial secretion system	3	302	57	19732	0.0112507	0.0883455	CL81547Contig1,CL8473Contig2,comp63408_c1_seq3_6	0.993377	0.288871	3.43883
ko00514	Other types of O-glycan biosynthesis	2	302	31	19732	0.0116244	0.0883455	CL9272Contig3,comp70930_c2_seq4_9	0.662252	0.157105	4.21534
Nl vs. Nf up regulated
ID	#Pathway	DEG	DEG_all	Gene	Gene_all	p-value	FDR	GeneID	Cluster_frequency(%)	Genome_frequency(%)	Enrichment_score
ko00791	Atrazine degradation	2	119	12	19732	4.52203e-05	0.00380778	comp48874_c1_seq2_3,comp44721_c0_seq13_2	1.68067	0.0608149	27.6359
ko00910	Nitrogen metabolism	6	119	166	19732	6.68032e-05	0.00380778	CL11423Contig2,CL10051Contig2,CL14155Contig1,comp58641_c0_seq35_4,CL25112Contig1,CL1265Contig4	5.04202	0.841273	5.99332
ko00901	Indole alkaloid biosynthesis	1	119	3	19732	0.000107773	0.00409537	CL263Contig4	0.840336	0.0152037	55.2717
ko00561	Glycerolipid metabolism	8	119	328	19732	0.00016926	0.00482392	CL5Contig80,comp53193_c0_seq1_1,comp48709_c2_seq7_1,comp69862_c1_seq44_6,CL33Contig17,comp46846_c0_seq14_3,comp47182_c0_seq2_1,CL561Contig3	6.72269	1.66227	4.04427
ko00965	Betalain biosynthesis	1	119	6	19732	0.000532505	0.0121411	CL5287Contig1	0.840336	0.0304075	27.6359
ko00900	Terpenoid backbone biosynthesis	6	119	244	19732	0.000702179	0.0133414	comp60047_c1_seq14_6,CL540Contig1,comp36765_c0_seq2_2,comp54258_c0_seq3_4,CL589Contig4,CL28921Contig1	5.04202	1.23657	4.07742
ko00072	Synthesis and degradation of ketone bodies	2	119	44	19732	0.00236538	0.0375975	comp60047_c1_seq14_6,comp36765_c0_seq2_2	1.68067	0.222988	7.53705
ko01040	Biosynthesis of unsaturated fatty acids	4	119	157	19732	0.00263842	0.0375975	CL30720Contig1,CL139Contig7,CL24537Contig1,CL15011Contig1	3.36134	0.795662	4.22459
ko00253	Tetracycline biosynthesis	1	119	15	19732	0.00359746	0.0390033	comp74628_c0_seq2_5	0.840336	0.0760186	11.0543
ko00471	D-Glutamine and D-glutamate metabolism	1	119	15	19732	0.00359746	0.0390033	CL1265Contig4	0.840336	0.0760186	11.0543
ko00650	Butanoate metabolism	3	119	105	19732	0.00376348	0.0390033	comp59308_c1_seq67_4,comp60047_c1_seq14_6,comp36765_c0_seq2_2	2.52101	0.532131	4.73758
ko00564	Glycerophospholipid metabolism	7	119	441	19732	0.00529661	0.0503178	CL5Contig80,comp53193_c0_seq1_1,comp48709_c2_seq7_1,CL439Contig2,comp69862_c1_seq44_6,comp46846_c0_seq14_3,comp47182_c0_seq2_1	5.88235	2.23495	2.63199
ko00904	Diterpenoid biosynthesis	2	119	63	19732	0.0065284	0.0572491	CL83252Contig1,CL25005Contig1	1.68067	0.319278	5.26397
ko00830	Retinol metabolism	2	119	72	19732	0.00942874	0.0759817	comp46456_c2_seq1_2,comp71153_c1_seq3_5	1.68067	0.36489	4.60598
ko00620	Pyruvate metabolism	6	119	398	19732	0.010486	0.0759817	CL5414Contig1,comp74628_c0_seq2_5,CL14751Contig1,CL26341Contig1,CL561Contig3,comp46039_c1_seq12_3	5.04202	2.01703	2.49973
ko00140	Steroid hormone biosynthesis	1	119	26	19732	0.0106641	0.0759817	comp46456_c2_seq1_2	0.840336	0.131766	6.3775
ko04075	Plant hormone signal transduction	8	119	615	19732	0.0121963	0.0817868	CL8285Contig1,CL52625Contig1,CL19531Contig1,comp57197_c0_seq5_6,comp51359_c0_seq3_1,comp53074_c0_seq9_3,CL8184Contig1,CL4281Contig2	6.72269	3.11676	2.15694
ko00010	Glycolysis / Gluconeogenesis	7	119	516	19732	0.0129736	0.0821659	CL5414Contig1,comp54142_c1_seq2_3,CL14751Contig1,comp46259_c0_seq1_3,CL1969Contig3,CL561Contig3,comp46039_c1_seq12_3	5.88235	2.61504	2.24943
ko00514	Other types of O-glycan biosynthesis	1	119	31	19732	0.0149622	0.0854264	comp70930_c2_seq4_9	0.840336	0.157105	5.34888
ko00780	Biotin metabolism	2	119	86	19732	0.0152277	0.0854264	CL24537Contig1,CL15011Contig1	1.68067	0.43584	3.85617
Nl vs. Nf down regulated
ID	#Pathway	DEG	DEG_all	Gene	Gene_all	p-value	FDR	GeneID	Cluster_frequency(%)	Genome_frequency(%)	Enrichment_score
ko00195	Photosynthesis	13	183	190	19732	2.86466e-09	3.52354e-07	comp62405_c1_seq4_8,comp59136_c1_seq3_4,comp72570_c0_seq1_9,comp57038_c1_seq14_7,CL6244Contig1,CL2Contig224,CL2Contig252,CL2Contig141,CL2Contig228,comp62844_c0_seq9_8,CL2Contig295,comp58552_c1_seq5_8,comp59340_c3_seq8_4	7.10383	0.962903	7.37751
ko00910	Nitrogen metabolism	9	183	166	19732	3.50757e-06	0.000215716	comp54853_c0_seq10_7,comp66490_c0_seq1_5,comp50972_c0_seq14_3,CL4435Contig1,comp56551_c1_seq2_4,CL18665Contig2,CL1925Contig1,CL39350Contig1,CL4435Contig2	4.91803	0.841273	5.84594
ko00190	Oxidative phosphorylation	14	183	584	19732	0.000371079	0.0101671	CL2Contig189,CL10732Contig1,comp49823_c0_seq7_1,comp50370_c2_seq4_2,CL2Contig14,CL23759Contig1,CL2Contig224,CL40445Contig1,CL2Contig141,CL2Contig228,CL2Contig69,comp59340_c3_seq8_4,comp45913_c0_seq2_3,comp54433_c2_seq7_7	7.65027	2.95966	2.58485
ko00361	Chlorocyclohexane and chlorobenzene degradation	1	183	4	19732	0.000507022	0.0101671	CL17231Contig1	0.546448	0.0202716	26.9563
ko00364	Fluorobenzoate degradation	1	183	4	19732	0.000507022	0.0101671	CL17231Contig1	0.546448	0.0202716	26.9563
ko00623	Toluene degradation	1	183	4	19732	0.000507022	0.0101671	CL17231Contig1	0.546448	0.0202716	26.9563
ko00480	Glutathione metabolism	9	183	305	19732	0.000578615	0.0101671	CL7907Contig1,CL3867Contig3,CL10919Contig2,CL3716Contig3,CL56569Contig1,CL38475Contig1,CL3651Contig1,CL10919Contig1,CL62567Contig1	4.91803	1.54571	3.18173
ko00565	Ether lipid metabolism	5	183	132	19732	0.00146228	0.0224825	CL34739Contig1,CL1405Contig1,comp57815_c0_seq1_8,CL8286Contig1,CL1Contig1632	2.73224	0.668964	4.08429
ko04070	Phosphatidylinositol signaling system	8	183	320	19732	0.00307712	0.0388777	CL11894Contig3,CL1Contig223,CL35166Contig2,CL12Contig5,CL3190Contig2,comp50666_c0_seq5_7,comp73697_c0_seq2_9,CL4120Contig2	4.37158	1.62173	2.69563
ko00030	Pentose phosphate pathway	6	183	206	19732	0.00316079	0.0388777	CL10919Contig2,comp44736_c0_seq1_8,CL56569Contig1,CL3651Contig1,CL10919Contig1,CL62567Contig1	3.27869	1.04399	3.14054
ko00261	Monobactam biosynthesis	2	183	41	19732	0.00645799	0.072212	CL630Contig2,CL630Contig6	1.0929	0.207784	5.25976
ko00564	Glycerophospholipid metabolism	9	183	441	19732	0.00827766	0.0791702	CL34739Contig1,CL3Contig75,comp48849_c1_seq2_1,CL1405Contig1,comp57815_c0_seq1_8,CL8286Contig1,CL3759Contig1,CL1Contig1632,comp70095_c0_seq18_9	4.91803	2.23495	2.20051
ko00300	Lysine biosynthesis	2	183	45	19732	0.00836758	0.0791702	CL630Contig2,CL630Contig6	1.0929	0.228056	4.79223
ko00750	Vitamin B6 metabolism	2	183	47	19732	0.00943368	0.0793059	CL19130Contig1,CL34225Contig1	1.0929	0.238192	4.5883
ko04024	cAMP signaling pathway	7	183	320	19732	0.0101829	0.0793059	CL35166Contig2,comp57815_c0_seq1_8,CL8286Contig1,CL12Contig5,CL1838Contig1,CL1Contig1632,CL4120Contig2	3.82514	1.62173	2.35867
ko00520	Amino sugar and nucleotide sugar metabolism	9	183	456	19732	0.0103162	0.0793059	CL62219Contig1,comp44180_c0_seq5_1,comp35095_c0_seq1_7,comp54158_c0_seq4_7,CL3491Contig1,CL29124Contig1,CL25767Contig1,CL12697Contig1,CL21466Contig1	4.91803	2.31097	2.12813
ko00460	Cyanoamino acid metabolism	4	183	150	19732	0.0130619	0.0911554	CL1867Contig3,comp54845_c0_seq2_8,CL7636Contig1,CL134Contig3	2.18579	0.760186	2.87534
ko00563	Glycosylphosphatidylinositol(GPI)-anchor biosynthesis	3	183	101	19732	0.014559	0.0911554	CL36940Contig1,CL23356Contig2,CL23356Contig1	1.63934	0.511859	3.20273
ko04064	NF-kappa B signaling pathway	3	183	102	19732	0.0150464	0.0911554	CL39548Contig1,CL34437Contig1,comp73031_c1_seq111_5	1.63934	0.516927	3.17133
ko03070	Bacterial secretion system	2	183	57	19732	0.0159167	0.0911554	CL81547Contig1,CL8473Contig2	1.0929	0.288871	3.78334
N0 vs. Nl up/down regulated
ID	#Pathway	DEG	DEG_all	Gene	Gene_all	p-value	FDR	GeneID	Cluster_frequency(%)	Genome_frequency(%)	Enrichment_score
ko00770	Pantothenate and CoA biosynthesis	4	72	117	19732	6.85484e-05	0.00534678	CL2943Contig1,comp60078_c0_seq4_8,CL7594Contig1,comp54069_c0_seq3_4	5.55556	0.592945	9.36942
ko00261	Monobactam biosynthesis	2	72	41	19732	0.000449534	0.0175318	CL25082Contig1,comp47399_c0_seq1_3	2.77778	0.207784	13.3686
ko00550	Peptidoglycan biosynthesis	1	72	12	19732	0.000846335	0.0220047	CL6371Contig4	1.38889	0.0608149	22.838
ko00983	Drug metabolism - other enzymes	2	72	72	19732	0.00231976	0.0338998	CL7594Contig1,CL80773Contig1	2.77778	0.36489	7.61265
ko01040	Biosynthesis of unsaturated fatty acids	3	72	157	19732	0.00260768	0.0338998	comp41184_c0_seq1_6,CL1Contig670,CL139Contig9	4.16667	0.795662	5.23673
ko03440	Homologous recombination	3	72	157	19732	0.00260768	0.0338998	comp47142_c0_seq2_1,CL13376Contig1,CL359Contig5	4.16667	0.795662	5.23673
ko00670	One carbon pool by folate	2	72	91	19732	0.00449771	0.0452135	CL1680Contig4,CL1680Contig2	2.77778	0.46118	6.0232
ko00062	Fatty acid elongation	2	72	92	19732	0.00463728	0.0452135	CL139Contig9,comp50213_c0_seq1_1	2.77778	0.466248	5.95773
ko00680	Methane metabolism	3	72	219	19732	0.00843245	0.0730812	CL1680Contig4,CL1680Contig2,CL73857Contig1	4.16667	1.10987	3.75419
ko04122	Sulfur relay system	1	72	42	19732	0.0102883	0.0802491	comp74971_c0_seq4_5	1.38889	0.212852	6.52513
ko00300	Lysine biosynthesis	1	72	45	19732	0.011747	0.0832967	comp47399_c0_seq1_3	1.38889	0.228056	6.09012
ko00460	Cyanoamino acid metabolism	2	72	150	19732	0.0175261	0.110793	CL1680Contig4,CL1680Contig2	2.77778	0.760186	3.65407
ko03430	Mismatch repair	2	72	157	19732	0.0197556	0.110793	comp59801_c1_seq141_4,CL359Contig5	2.77778	0.795662	3.49115
ko00240	Pyrimidine metabolism	4	72	431	19732	0.0205762	0.110793	comp72414_c0_seq5_9,CL7594Contig1,comp54604_c0_seq27_3,CL80773Contig1	5.55556	2.18427	2.54344
ko00260	Glycine, serine and threonine metabolism	3	72	289	19732	0.0213064	0.110793	CL1680Contig4,CL1680Contig2,comp47399_c0_seq1_3	4.16667	1.46463	2.84487
ko00630	Glyoxylate and dicarboxylate metabolism	3	72	298	19732	0.0235253	0.114686	comp66375_c0_seq30_5,CL1680Contig4,CL1680Contig2	4.16667	1.51024	2.75895
ko03460	Fanconi anemia pathway	2	72	172	19732	0.025038	0.11488	CL13376Contig1,CL359Contig5	2.77778	0.871681	3.18669
ko00410	beta-Alanine metabolism	2	72	188	19732	0.0314312	0.119916	CL81423Contig1,CL7594Contig1	2.77778	0.952767	2.91548
ko00531	Glycosaminoglycan degradation	1	72	77	19732	0.0322228	0.119916	CL32110Contig1	1.38889	0.390229	3.55916
ko00790	Folate biosynthesis	1	72	77	19732	0.0322228	0.119916	comp74971_c0_seq4_5	1.38889	0.390229	3.55916
N0 vs. Nl up regulated
ID	#Pathway	DEG	DEG_all	Gene	Gene_all	p-value	FDR	GeneID	Cluster_frequency(%)	Genome_frequency(%)	Enrichment_score
ko03440	Homologous recombination	2	32	157	19732	0.00206925	0.0484546	comp47142_c0_seq2_1,CL359Contig5	6.25	0.795662	7.8551
ko04122	Sulfur relay system	1	32	42	19732	0.00210672	0.0484546	comp74971_c0_seq4_5	3.125	0.212852	14.6815
ko00983	Drug metabolism - other enzymes	1	32	72	19732	0.00606758	0.0635812	CL80773Contig1	3.125	0.36489	8.56424
ko00531	Glycosaminoglycan degradation	1	32	77	19732	0.00691101	0.0635812	CL32110Contig1	3.125	0.390229	8.00812
ko00790	Folate biosynthesis	1	32	77	19732	0.00691101	0.0635812	comp74971_c0_seq4_5	3.125	0.390229	8.00812
ko00062	Fatty acid elongation	1	32	92	19732	0.00973887	0.0746646	comp50213_c0_seq1_1	3.125	0.466248	6.70245
ko00770	Pantothenate and CoA biosynthesis	1	32	117	19732	0.0153962	0.07918	CL2943Contig1	3.125	0.592945	5.2703
ko04111	Cell cycle - yeast	2	32	337	19732	0.0169831	0.07918	comp49546_c0_seq27_1,CL53141Contig1	6.25	1.70789	3.6595
ko01212	Fatty acid metabolism	2	32	339	19732	0.0172506	0.07918	CL37714Contig1,CL1Contig670	6.25	1.71802	3.63791
ko03030	DNA replication	1	32	138	19732	0.0210003	0.07918	CL359Contig5	3.125	0.699372	4.4683
ko04068	FoxO signaling pathway	2	32	370	19732	0.0217011	0.07918	comp53321_c1_seq3_1,comp46564_c0_seq2_3	6.25	1.87513	3.33311
ko01040	Biosynthesis of unsaturated fatty acids	1	32	157	19732	0.0266928	0.07918	CL1Contig670	3.125	0.795662	3.92755
ko03430	Mismatch repair	1	32	157	19732	0.0266928	0.07918	CL359Contig5	3.125	0.795662	3.92755
ko04391	Hippo signaling pathway -fly	1	32	159	19732	0.0273247	0.07918	comp49546_c0_seq27_1	3.125	0.805798	3.87814
ko00061	Fatty acid biosynthesis	1	32	165	19732	0.0292567	0.07918	CL37714Contig1	3.125	0.836205	3.73712
ko04390	Hippo signaling pathway	1	32	170	19732	0.0309075	0.07918	comp49546_c0_seq27_1	3.125	0.861545	3.62721
ko03460	Fanconi anemia pathway	1	32	172	19732	0.0315781	0.07918	CL359Contig5	3.125	0.871681	3.58503
ko00564	Glycerophospholipid metabolism	2	32	441	19732	0.0340633	0.07918	comp51521_c0_seq12_7,CL3759Contig1	6.25	2.23495	2.79649
ko00640	Propanoate metabolism	1	32	187	19732	0.036789	0.07918	CL81423Contig1	3.125	0.947699	3.29746
ko00410	beta-Alanine metabolism	1	32	188	19732	0.0371475	0.07918	CL81423Contig1	3.125	0.952767	3.27992
N0 vs. Nl down regulated
ID	#Pathway	DEG	DEG_all	Gene	Gene_all	p-value	FDR	GeneID	Cluster_frequency(%)	Genome_frequency(%)	Enrichment_score
ko00261	Monobactam biosynthesis	2	40	41	19732	7.79852e-05	0.00259312	CL25082Contig1,comp47399_c0_seq1_3	5	0.207784	24.0634
ko00770	Pantothenate and CoA biosynthesis	3	40	117	19732	9.09865e-05	0.00259312	comp60078_c0_seq4_8,CL7594Contig1,comp54069_c0_seq3_4	7.5	0.592945	12.6487
ko00550	Peptidoglycan biosynthesis	1	40	12	19732	0.000261079	0.0049605	CL6371Contig4	2.5	0.0608149	41.1083
ko00670	One carbon pool by folate	2	40	91	19732	0.000828549	0.011245	CL1680Contig4,CL1680Contig2	5	0.46118	10.8418
ko00680	Methane metabolism	3	40	219	19732	0.000986399	0.011245	CL1680Contig4,CL1680Contig2,CL73857Contig1	7.5	1.10987	6.75753
ko00260	Glycine, serine and threonine metabolism	3	40	289	19732	0.00272027	0.0249207	CL1680Contig4,CL1680Contig2,comp47399_c0_seq1_3	7.5	1.46463	5.12076
ko00460	Cyanoamino acid metabolism	2	40	150	19732	0.00346221	0.0249207	CL1680Contig4,CL1680Contig2	5	0.760186	6.57733
ko00300	Lysine biosynthesis	1	40	45	19732	0.00375412	0.0249207	comp47399_c0_seq1_3	2.5	0.228056	10.9622
ko01040	Biosynthesis of unsaturated fatty acids	2	40	157	19732	0.00393485	0.0249207	comp41184_c0_seq1_6,CL139Contig9	5	0.795662	6.28408
ko00983	Drug metabolism - other enzymes	1	40	72	19732	0.00936426	0.0533763	CL7594Contig1	2.5	0.36489	6.85139
ko00240	Pyrimidine metabolism	3	40	431	19732	0.0110306	0.0568129	comp72414_c0_seq5_9,CL7594Contig1,comp54604_c0_seq27_3	7.5	2.18427	3.43364
ko00780	Biotin metabolism	1	40	86	19732	0.0131542	0.0568129	CL39650Contig1	2.5	0.43584	5.73605
ko00450	Selenocompound metabolism	1	40	91	19732	0.0146443	0.0568129	CL25082Contig1	2.5	0.46118	5.42088
ko02020	Two-component system	1	40	91	19732	0.0146443	0.0568129	CL53540Contig1	2.5	0.46118	5.42088
ko00062	Fatty acid elongation	1	40	92	19732	0.0149508	0.0568129	CL139Contig9	2.5	0.466248	5.36196
ko00250	Alanine, aspartate and glutamate metabolism	2	40	264	19732	0.0162485	0.0578853	comp54604_c0_seq27_3,CL67162Contig1	5	1.33793	3.73712
ko00511	Other glycan degradation	1	40	110	19732	0.0209283	0.0701714	CL82757Contig1	2.5	0.55747	4.48455
ko00630	Glyoxylate and dicarboxylate metabolism	2	40	298	19732	0.0223243	0.0706937	CL1680Contig4,CL1680Contig2	5	1.51024	3.31074
ko00920	Sulfur metabolism	1	40	122	19732	0.0253782	0.0761345	CL25082Contig1	2.5	0.618285	4.04344
ko00561	Glycerolipid metabolism	2	40	328	19732	0.0285863	0.081471	CL60709Contig1,CL73857Contig1	5	1.66227	3.00793

## Sheet: Kegg top20 enrichment 60d
Top 20 KEGG enrichment pathways involved in Nf vs.N0, Nf vs.Nl and Nl vs.N0 at 60 DAT
Nf vs. N0 up/down regulated
ID	#Pathway	DEG	DEG_all	Gene	Gene_all	p-value	FDR	GeneID	Cluster_frequency(%)	Genome_frequency(%)	Enrichment_score
ko00052	Galactose metabolism	34	1060	286	19732	4.80866e-06	0.000875161	comp52234_c2_seq2_2,CL2473Contig6,CL1101Contig3,CL56781Contig1,comp53984_c0_seq2_6,comp65896_c2_seq1_9,comp56750_c0_seq1_8,CL45293Contig1,CL16890Contig2,comp39224_c0_seq2_8,comp57887_c0_seq16_4,CL16Contig31,CL5148Contig1,comp43834_c0_seq3_1,CL2473Contig5,CL38Contig15,CL29271Contig1,CL3491Contig1,comp65453_c1_seq1_5,comp38397_c0_seq1_1,comp60057_c0_seq11_8,CL2473Contig4,comp57896_c1_seq104_8,CL719…	3.20755	1.44942	2.21298
ko00940	Phenylpropanoid biosynthesis	41	1060	383	19732	9.41033e-06	0.000875161	CL70761Contig1,comp68852_c0_seq4_9,CL2552Contig3,CL5156Contig3,comp64127_c1_seq1_6,comp54484_c2_seq1_8,CL11176Contig1,CL1613Contig2,CL54498Contig1,comp50646_c0_seq2_7,CL317Contig8,comp54845_c0_seq2_8,CL1Contig358,comp65024_c0_seq1_5,comp54422_c1_seq2_3,CL4287Contig2,CL16119Contig3,CL7636Contig1,CL1575Contig3,CL16368Contig1,CL134Contig2,CL10280Contig1,CL25372Contig1,comp49421_c1_seq49_2,CL26098Con…	3.86792	1.94101	1.99274
ko00910	Nitrogen metabolism	22	1060	166	19732	2.83459e-05	0.00175745	CL10051Contig2,comp66490_c0_seq1_5,CL4435Contig1,CL43Contig4,CL43632Contig1,comp15522_c0_seq1_2,CL38371Contig1,comp50491_c0_seq7_7,CL1925Contig1,comp55248_c1_seq5_8,comp48626_c4_seq23_1,CL1Contig807,comp58326_c2_seq4_4,CL9950Contig1,CL4239Contig2,CL39350Contig1,CL1265Contig4,comp68113_c0_seq21_5,comp43382_c0_seq1_1,CL4435Contig2,CL1Contig133,CL6149Contig2	2.07547	0.841273	2.46706
ko00943	Isoflavonoid biosynthesis	3	1060	5	19732	3.96436e-05	0.00184343	CL2045Contig1,CL8828Contig1,CL63016Contig1	0.283019	0.0253395	11.1691
ko00941	Flavonoid biosynthesis	17	1060	125	19732	0.000123614	0.00459845	CL70761Contig1,CL5156Contig3,CL45502Contig1,CL1613Contig2,CL317Contig8,comp54422_c1_seq2_3,CL55399Contig1,CL16119Contig3,CL1575Contig3,CL10280Contig1,CL30941Contig1,CL316Contig3,CL43773Contig1,CL176Contig3,CL767Contig3,CL1Contig901,CL9658Contig1	1.60377	0.633489	2.53165
ko00904	Diterpenoid biosynthesis	10	1060	63	19732	0.000479917	0.0148774	comp58130_c2_seq1_4,comp71229_c1_seq2_9,CL1Contig773,CL83252Contig1,comp35602_c0_seq1_4,CL25946Contig1,CL980Contig3,CL25255Contig1,CL25005Contig1,CL2749Contig1	0.943396	0.319278	2.95478
ko04075	Plant hormone signal transduction	50	1060	615	19732	0.00141423	0.0314443	CL10135Contig1,CL1833Contig4,CL24841Contig1,comp50848_c1_seq3_4,CL14649Contig2,CL5Contig4,CL10579Contig2,CL25559Contig1,comp38598_c0_seq1_7,CL25169Contig1,CL81795Contig1,CL24841Contig2,CL128Contig7,CL1430Contig3,CL11562Contig2,comp61523_c0_seq8_9,CL460Contig5,CL10253Contig2,comp54281_c0_seq204_4,CL1136Contig3,CL1956Contig2,CL10579Contig1,CL17546Contig1,CL505Contig2,comp52062_c1_seq16_1,CL24598Con…	4.71698	3.11676	1.51342
ko00945	Stilbenoid, diarylheptanoid and gingerol biosynthesis	15	1060	129	19732	0.00151352	0.0314443	CL70761Contig1,CL5156Contig3,CL1613Contig2,CL55385Contig1,CL317Contig8,CL4072Contig2,comp54422_c1_seq2_3,CL16119Contig3,CL1575Contig3,CL10280Contig1,CL316Contig3,CL176Contig3,CL767Contig3,CL1Contig901,CL9658Contig1	1.41509	0.65376	2.16455
ko00900	Terpenoid backbone biosynthesis	24	1060	244	19732	0.0015215	0.0314443	comp68373_c0_seq7_9,CL540Contig2,CL4842Contig1,comp59962_c0_seq1_4,CL870Contig2,comp47624_c0_seq1_4,comp68928_c1_seq11_6,CL540Contig1,CL8090Contig1,CL1195Contig3,CL35976Contig1,CL47175Contig1,comp64888_c0_seq8_5,comp54258_c0_seq3_4,CL540Contig3,CL116Contig2,CL589Contig4,CL40159Contig1,CL15699Contig2,CL28921Contig1,CL35318Contig1,CL116Contig1,CL1282Contig1,comp45317_c0_seq4_1	2.26415	1.23657	1.83099
ko00140	Steroid hormone biosynthesis	5	1060	26	19732	0.0021575	0.0401294	CL11947Contig2,comp70291_c0_seq7_9,comp59593_c0_seq38_4,comp46456_c2_seq1_2,CL2313Contig2	0.471698	0.131766	3.57983
ko00965	Betalain biosynthesis	2	1060	6	19732	0.00273519	0.0448847	comp20708_c0_seq2_1,CL5287Contig1	0.188679	0.0304075	6.20503
ko00791	Atrazine degradation	3	1060	12	19732	0.00289579	0.0448847	CL36232Contig1,comp48752_c0_seq4_7,CL52216Contig1	0.283019	0.0608149	4.65377
ko04064	NF-kappa B signaling pathway	12	1060	102	19732	0.00317976	0.045495	comp54759_c2_seq1_3,comp47891_c0_seq17_1,CL27380Contig1,CL39548Contig1,comp68431_c0_seq29_6,CL34437Contig1,comp66802_c0_seq14_6,CL12963Contig1,comp50606_c0_seq2_8,comp62150_c0_seq1_6,comp73031_c1_seq111_5,CL4835Contig1	1.13208	0.516927	2.19001
ko00830	Retinol metabolism	9	1060	72	19732	0.00496641	0.0616325	CL13363Contig1,comp70291_c0_seq7_9,comp46456_c2_seq1_2,CL2313Contig2,comp44885_c0_seq1_7,CL44524Contig1,CL10603Contig1,comp72281_c0_seq2_9,comp71153_c1_seq3_5	0.849057	0.36489	2.32689
ko00360	Phenylalanine metabolism	16	1060	158	19732	0.00497036	0.0616325	CL7426Contig1,comp68852_c0_seq4_9,comp50646_c0_seq2_7,CL317Contig8,CL1Contig358,comp54422_c1_seq2_3,CL26426Contig1,CL1575Contig3,CL16368Contig1,CL55940Contig1,CL25372Contig1,comp62055_c1_seq1_8,CL4845Contig2,CL1Contig901,comp58711_c0_seq1_4,CL9658Contig1	1.50943	0.80073	1.88507
ko00920	Sulfur metabolism	13	1060	122	19732	0.00587192	0.0682611	CL59049Contig1,comp54443_c3_seq6_4,comp52166_c0_seq3_8,CL6791Contig1,CL7311Contig1,CL39061Contig1,comp44747_c0_seq7_2,CL57973Contig1,CL1583Contig4,CL81829Contig1,CL47809Contig1,CL18633Contig1,CL10607Contig1	1.22642	0.618285	1.98358
ko00195	Photosynthesis	18	1060	190	19732	0.00683241	0.0725281	comp69905_c0_seq20_6,comp72570_c0_seq1_9,comp57038_c1_seq14_7,CL6244Contig1,CL7678Contig1,CL2Contig224,CL2Contig104,comp68149_c0_seq5_9,CL2Contig252,CL2Contig141,CL2Contig228,comp62844_c0_seq9_8,comp33365_c0_seq1_2,CL2Contig295,comp59340_c3_seq8_4,CL9649Contig2,CL39780Contig1,CL2Contig114	1.69811	0.962903	1.76354
ko00471	D-Glutamine and D-glutamate metabolism	3	1060	15	19732	0.00701885	0.0725281	CL4239Contig2,CL1265Contig4,comp43382_c0_seq1_1	0.283019	0.0760186	3.72302
ko00500	Starch and sucrose metabolism	53	1060	719	19732	0.0081482	0.0738731	comp52234_c2_seq2_2,CL1043Contig3,CL2410Contig2,CL961Contig2,CL8666Contig1,CL39122Contig1,CL15Contig21,CL1621Contig4,comp64127_c1_seq1_6,CL11176Contig1,CL16890Contig2,comp39224_c0_seq2_8,CL16Contig31,CL3233Contig1,CL6502Contig3,CL9715Contig3,CL1926Contig2,CL43126Contig1,CL29271Contig1,CL37804Contig1,comp54845_c0_seq2_8,CL961Contig5,comp55316_c0_seq157_4,CL49342Contig1,comp60057_c0_seq11_8,CL2378C…	5	3.64383	1.37218
ko00523	Polyketide sugar unit biosynthesis	1	1060	3	19732	0.00834051	0.0738731	CL1Contig226	0.0943396	0.0152037	6.20503
Nf vs. N0 up regulated
ID	#Pathway	DEG	DEG_all	Gene	Gene_all	p-value	FDR	GeneID	Cluster_frequency(%)	Genome_frequency(%)	Enrichment_score
ko04075	Plant hormone signal transduction	35	366	615	19732	1.25939e-09	1.76315e-07	CL10135Contig1,CL1833Contig4,CL24841Contig1,comp50848_c1_seq3_4,CL14649Contig2,CL5Contig4,CL10579Contig2,CL24841Contig2,CL11562Contig2,comp61523_c0_seq8_9,CL460Contig5,CL1136Contig3,CL10579Contig1,CL17546Contig1,CL505Contig2,comp52062_c1_seq16_1,CL24598Contig1,CL26643Contig1,CL2057Contig1,CL4386Contig3,CL3808Contig2,CL1Contig444,CL2276Contig1,CL1833Contig5,comp15443_c0_seq1_2,CL10728Contig1,CL113…	9.56284	3.11676	3.06819
ko00940	Phenylpropanoid biosynthesis	25	366	383	19732	1.44912e-08	1.01439e-06	CL70761Contig1,comp68852_c0_seq4_9,CL2552Contig3,CL5156Contig3,comp54484_c2_seq1_8,CL1613Contig2,comp50646_c0_seq2_7,CL317Contig8,CL1Contig358,comp65024_c0_seq1_5,comp54422_c1_seq2_3,CL16119Contig3,CL10280Contig1,CL25372Contig1,CL26098Contig1,comp62055_c1_seq1_8,CL316Contig3,CL4845Contig2,CL2259Contig2,CL176Contig3,CL1176Contig2,CL72Contig17,CL767Contig3,CL1Contig901,CL10770Contig1	6.8306	1.94101	3.5191
ko00900	Terpenoid backbone biosynthesis	19	366	244	19732	3.26633e-08	1.52429e-06	comp68373_c0_seq7_9,CL540Contig2,CL4842Contig1,comp59962_c0_seq1_4,CL870Contig2,comp47624_c0_seq1_4,CL540Contig1,CL8090Contig1,CL1195Contig3,CL35976Contig1,comp64888_c0_seq8_5,comp54258_c0_seq3_4,CL540Contig3,CL116Contig2,CL589Contig4,CL15699Contig2,CL28921Contig1,CL35318Contig1,comp45317_c0_seq4_1	5.19126	1.23657	4.19811
ko00941	Flavonoid biosynthesis	12	366	125	19732	5.86068e-07	2.05124e-05	CL70761Contig1,CL5156Contig3,CL1613Contig2,CL317Contig8,comp54422_c1_seq2_3,CL16119Contig3,CL10280Contig1,CL30941Contig1,CL316Contig3,CL176Contig3,CL767Contig3,CL1Contig901	3.27869	0.633489	5.17561
ko00945	Stilbenoid, diarylheptanoid and gingerol biosynthesis	12	366	129	19732	8.43011e-07	2.36043e-05	CL70761Contig1,CL5156Contig3,CL1613Contig2,CL317Contig8,CL4072Contig2,comp54422_c1_seq2_3,CL16119Contig3,CL10280Contig1,CL316Contig3,CL176Contig3,CL767Contig3,CL1Contig901	3.27869	0.65376	5.01512
ko00360	Phenylalanine metabolism	13	366	158	19732	1.52829e-06	3.566e-05	CL7426Contig1,comp68852_c0_seq4_9,comp50646_c0_seq2_7,CL317Contig8,CL1Contig358,comp54422_c1_seq2_3,CL26426Contig1,CL55940Contig1,CL25372Contig1,comp62055_c1_seq1_8,CL4845Contig2,CL1Contig901,comp58711_c0_seq1_4	3.55191	0.80073	4.43584
ko00904	Diterpenoid biosynthesis	8	366	63	19732	2.30582e-06	4.61164e-05	comp58130_c2_seq1_4,CL1Contig773,CL83252Contig1,CL25946Contig1,CL980Contig3,CL25255Contig1,CL25005Contig1,CL2749Contig1	2.18579	0.319278	6.84604
ko00906	Carotenoid biosynthesis	11	366	155	19732	3.33516e-05	0.000583654	comp54979_c5_seq58_3,CL45367Contig1,comp74263_c0_seq1_5,comp75101_c1_seq28_9,comp49340_c0_seq2_1,CL6778Contig1,CL1Contig1903,CL46293Contig2,CL9168Contig2,comp74142_c0_seq65_9,CL18172Contig1	3.00546	0.785526	3.82605
ko00943	Isoflavonoid biosynthesis	2	366	5	19732	6.15693e-05	0.000957744	CL8828Contig1,CL63016Contig1	0.546448	0.0253395	21.565
ko00965	Betalain biosynthesis	2	366	6	19732	0.000121442	0.00170019	comp20708_c0_seq2_1,CL5287Contig1	0.546448	0.0304075	17.9709
ko00471	D-Glutamine and D-glutamate metabolism	3	366	15	19732	0.000135183	0.00172051	CL4239Contig2,CL1265Contig4,comp43382_c0_seq1_1	0.819672	0.0760186	10.7825
ko00830	Retinol metabolism	6	366	72	19732	0.000373226	0.0043543	comp70291_c0_seq7_9,comp46456_c2_seq1_2,CL2313Contig2,comp44885_c0_seq1_7,comp72281_c0_seq2_9,comp71153_c1_seq3_5	1.63934	0.36489	4.49271
ko00073	Cutin, suberine and wax biosynthesis	6	366	84	19732	0.000949604	0.0101672	comp48455_c1_seq3_4,CL6046Contig1,CL18967Contig1,CL15458Contig1,CL26393Contig1,CL3665Contig2	1.63934	0.425704	3.8509
ko00523	Polyketide sugar unit biosynthesis	1	366	3	19732	0.00101672	0.0101672	CL1Contig226	0.273224	0.0152037	17.9709
ko00910	Nitrogen metabolism	9	366	166	19732	0.00109749	0.0102433	comp15522_c0_seq1_2,CL38371Contig1,comp58326_c2_seq4_4,CL4239Contig2,CL1265Contig4,comp68113_c0_seq21_5,comp43382_c0_seq1_1,CL1Contig133,CL6149Contig2	2.45902	0.841273	2.92297
ko00140	Steroid hormone biosynthesis	3	366	26	19732	0.00126026	0.0110273	comp70291_c0_seq7_9,comp46456_c2_seq1_2,CL2313Contig2	0.819672	0.131766	6.22068
ko00908	Zeatin biosynthesis	5	366	75	19732	0.00268442	0.022107	comp63397_c1_seq3_6,comp56396_c0_seq2_4,CL1834Contig3,CL71Contig3,CL3023Contig1	1.36612	0.380093	3.59417
ko00062	Fatty acid elongation	5	366	92	19732	0.00732123	0.0545788	comp72651_c0_seq1_9,CL5Contig20,CL10316Contig1,CL5Contig28,comp50213_c0_seq1_1	1.36612	0.466248	2.93003
ko00052	Galactose metabolism	11	366	286	19732	0.00740712	0.0545788	comp65896_c2_seq1_9,comp43834_c0_seq3_1,CL38Contig15,comp65453_c1_seq1_5,comp38397_c0_seq1_1,CL32849Contig1,CL1Contig235,comp74628_c0_seq1_9,comp46229_c2_seq4_3,CL1Contig141,CL38Contig13	3.00546	1.44942	2.07356
ko04146	Peroxisome	14	366	402	19732	0.0084438	0.0584975	comp44056_c0_seq1_4,CL15923Contig1,comp46795_c1_seq1_1,CL29864Contig1,comp35704_c0_seq2_3,CL5791Contig1,CL1216Contig3,comp23507_c0_seq1_8,comp50772_c0_seq3_9,CL17849Contig2,CL5858Contig1,comp71622_c1_seq1_5,CL3665Contig2,comp72291_c0_seq3_5	3.82514	2.0373	1.87755
Nf vs. N0 down regulated
ID	#Pathway	DEG	DEG_all	Gene	Gene_all	p-value	FDR	GeneID	Cluster_frequency(%)	Genome_frequency(%)	Enrichment_score
ko00052	Galactose metabolism	23	694	286	19732	8.01569e-05	0.013787	comp52234_c2_seq2_2,CL2473Contig6,CL1101Contig3,CL56781Contig1,comp53984_c0_seq2_6,comp56750_c0_seq1_8,CL45293Contig1,CL16890Contig2,comp39224_c0_seq2_8,comp57887_c0_seq16_4,CL16Contig31,CL5148Contig1,CL2473Contig5,CL29271Contig1,CL3491Contig1,comp60057_c0_seq11_8,CL2473Contig4,comp57896_c1_seq104_8,CL7198Contig1,comp38180_c0_seq1_7,comp73520_c0_seq22_5,comp47064_c1_seq6_1,CL31334Contig2	3.31412	1.44942	2.28651
ko00195	Photosynthesis	16	694	190	19732	0.000407561	0.0247734	comp69905_c0_seq20_6,comp72570_c0_seq1_9,comp57038_c1_seq14_7,CL6244Contig1,CL2Contig224,CL2Contig104,comp68149_c0_seq5_9,CL2Contig252,CL2Contig141,CL2Contig228,comp62844_c0_seq9_8,CL2Contig295,comp59340_c3_seq8_4,CL9649Contig2,CL39780Contig1,CL2Contig114	2.30548	0.962903	2.3943
ko00190	Oxidative phosphorylation	36	694	584	19732	0.000432095	0.0247734	CL63223Contig1,CL59420Contig1,CL63151Contig1,comp57582_c0_seq1_8,CL83156Contig1,comp45828_c0_seq3_7,CL2Contig189,CL5079Contig1,comp69905_c0_seq20_6,CL26524Contig1,comp49823_c0_seq7_1,CL65237Contig1,CL2Contig224,CL2Contig104,CL981Contig3,CL30642Contig1,comp68149_c0_seq5_9,CL56034Contig1,CL81843Contig1,comp52211_c3_seq2_1,CL2Contig141,CL2Contig228,CL82213Contig1,CL2Contig69,CL65709Contig1,CL2Contig…	5.18732	2.95966	1.75267
ko04064	NF-kappa B signaling pathway	10	694	102	19732	0.000918597	0.0394997	comp47891_c0_seq17_1,CL27380Contig1,CL39548Contig1,comp68431_c0_seq29_6,CL34437Contig1,comp66802_c0_seq14_6,comp50606_c0_seq2_8,comp62150_c0_seq1_6,comp73031_c1_seq111_5,CL4835Contig1	1.44092	0.516927	2.78748
ko00500	Starch and sucrose metabolism	40	694	719	19732	0.00170035	0.0550624	comp52234_c2_seq2_2,CL2410Contig2,CL961Contig2,CL8666Contig1,CL39122Contig1,CL1621Contig4,comp64127_c1_seq1_6,CL11176Contig1,CL16890Contig2,comp39224_c0_seq2_8,CL16Contig31,CL6502Contig3,CL9715Contig3,CL1926Contig2,CL43126Contig1,CL29271Contig1,CL37804Contig1,comp54845_c0_seq2_8,CL49342Contig1,comp60057_c0_seq11_8,CL2378Contig2,CL4287Contig2,comp71571_c3_seq111_9,CL2099Contig2,CL7198Contig1,CL763…	5.76369	3.64383	1.58177
ko00521	Streptomycin biosynthesis	6	694	52	19732	0.00218205	0.0550624	CL33808Contig1,CL16890Contig2,comp39224_c0_seq2_8,comp60057_c0_seq11_8,CL7198Contig1,CL1504Contig2	0.864553	0.263531	3.28065
ko00910	Nitrogen metabolism	13	694	166	19732	0.00224091	0.0550624	CL10051Contig2,comp66490_c0_seq1_5,CL4435Contig1,CL43Contig4,CL43632Contig1,comp50491_c0_seq7_7,CL1925Contig1,comp55248_c1_seq5_8,comp48626_c4_seq23_1,CL1Contig807,CL9950Contig1,CL39350Contig1,CL4435Contig2	1.8732	0.841273	2.22662
ko04152	AMPK signaling pathway	30	694	516	19732	0.00278276	0.0598293	comp55494_c1_seq3_3,CL44453Contig1,CL1Contig1849,CL15471Contig1,CL55298Contig1,CL30720Contig1,CL89Contig8,CL6229Contig3,CL6690Contig3,CL39295Contig2,CL3343Contig2,comp69910_c0_seq21_6,comp67043_c0_seq31_5,CL35134Contig1,comp53358_c0_seq2_4,CL55295Contig1,CL13887Contig1,CL53285Contig1,comp57896_c1_seq104_8,CL38902Contig1,CL45489Contig1,CL44648Contig1,CL9071Contig1,comp52830_c0_seq1_8,CL6838Contig1…	4.32277	2.61504	1.65304
ko01053	Biosynthesis of siderophore group nonribosomal peptides	1	694	3	19732	0.00361925	0.0617841	comp67115_c0_seq2_5	0.144092	0.0152037	9.47743
ko00920	Sulfur metabolism	10	694	122	19732	0.00385697	0.0617841	CL59049Contig1,comp54443_c3_seq6_4,comp52166_c0_seq3_8,CL6791Contig1,CL39061Contig1,CL57973Contig1,CL1583Contig4,CL47809Contig1,CL18633Contig1,CL10607Contig1	1.44092	0.618285	2.33051
ko03010	Ribosome	81	694	1742	19732	0.00395131	0.0617841	CL56514Contig1,CL64877Contig1,CL45994Contig1,CL52497Contig1,CL54076Contig1,CL54359Contig1,comp67875_c1_seq20_6,CL82893Contig1,CL52424Contig1,CL62707Contig1,CL66156Contig1,CL53753Contig1,CL82673Contig1,CL53739Contig1,CL77036Contig1,CL54973Contig1,CL41731Contig1,CL59054Contig1,CL53598Contig1,CL52337Contig1,CL54140Contig1,CL56083Contig1,CL2Contig57,CL63779Contig1,CL56549Contig1,CL4403Contig1,CL52157…	11.6715	8.8283	1.32205
ko04151	PI3K-Akt signaling pathway	31	694	568	19732	0.00622066	0.0823532	comp55494_c1_seq3_3,CL1Contig1849,CL1991Contig2,CL14121Contig1,CL63Contig7,CL89Contig8,CL6229Contig3,CL6690Contig3,CL52337Contig1,comp69910_c0_seq21_6,comp54841_c0_seq10_8,comp67043_c0_seq31_5,CL55295Contig1,CL13887Contig1,CL38902Contig1,CL25221Contig1,CL13152Contig2,CL9071Contig1,CL19279Contig1,comp52830_c0_seq1_8,CL6838Contig1,CL6340Contig1,CL2Contig1,CL83914Contig1,CL16134Contig1,CL44546Contig…	4.46686	2.87857	1.55176
ko00562	Inositol phosphate metabolism	18	694	286	19732	0.00622437	0.0823532	CL45555Contig1,CL33808Contig1,CL77138Contig1,CL1Contig223,CL39061Contig1,comp67891_c1_seq16_5,CL1405Contig1,CL1Contig416,comp52605_c0_seq74_7,CL1504Contig2,CL6398Contig1,CL2656Contig1,CL3190Contig2,comp50666_c0_seq5_7,comp73697_c0_seq2_9,comp64372_c1_seq31_6,CL81741Contig1,comp65035_c0_seq1_6	2.59366	1.44942	1.78944
ko00791	Atrazine degradation	2	694	12	19732	0.00751415	0.0923167	CL36232Contig1,CL52216Contig1	0.288184	0.0608149	4.73871
ko00710	Carbon fixation in photosynthetic organisms	19	694	316	19732	0.00853124	0.0978249	CL38261Contig1,CL35255Contig1,CL39295Contig2,comp55130_c1_seq2_7,CL2Contig290,CL24909Contig1,CL36809Contig1,CL6694Contig1,CL3016Contig1,CL1Contig416,CL35723Contig1,comp44736_c0_seq1_8,CL8486Contig2,CL2656Contig1,CL7722Contig2,CL53449Contig1,CL10941Contig1,CL128Contig4,comp75423_c4_seq1_9	2.73775	1.60146	1.70954
ko04115	p53 signaling pathway	12	694	179	19732	0.0108564	0.116444	comp45000_c0_seq2_4,comp50491_c1_seq30_7,comp49188_c0_seq30_3,CL2585Contig3,comp46346_c0_seq9_2,CL11323Contig1,comp64762_c0_seq33_6,comp55333_c1_seq13_4,comp55248_c0_seq17_8,CL2049Contig3,CL9968Contig2,CL2585Contig2	1.72911	0.907156	1.90607
ko00943	Isoflavonoid biosynthesis	1	694	5	19732	0.011509	0.116444	CL2045Contig1	0.144092	0.0253395	5.68646
ko00053	Ascorbate and aldarate metabolism	11	694	164	19732	0.0133103	0.12412	CL61757Contig1,CL12387Contig1,CL45555Contig1,CL5944Contig1,CL77138Contig1,comp47928_c2_seq2_1,CL1Contig223,CL60Contig11,CL3491Contig1,CL19043Contig1,CL81741Contig1	1.58501	0.831137	1.90704
ko00253	Tetracycline biosynthesis	2	694	15	19732	0.0143688	0.12412	comp56777_c0_seq4_7,CL487Contig3	0.288184	0.0760186	3.79097
ko00511	Other glycan degradation	8	694	110	19732	0.0155568	0.12412	CL5448Contig2,CL4718Contig3,CL5148Contig1,CL4718Contig4,CL2518Contig3,comp75114_c1_seq10_5,CL13896Contig1,CL31334Contig2	1.15274	0.55747	2.0678
Nf vs. Nl up/down regulated
ID	#Pathway	DEG	DEG_all	Gene	Gene_all	p-value	FDR	GeneID	Cluster_frequency(%)	Genome_frequency(%)	Enrichment_score
ko00561	Glycerolipid metabolism	23	450	328	19732	5.88667e-07	9.59528e-05	CL24320Contig4,CL8382Contig2,CL59272Contig1,CL37563Contig1,CL1000Contig9,comp53193_c0_seq1_1,CL45293Contig1,CL24320Contig1,CL1000Contig1,CL83415Contig1,comp55516_c0_seq64_7,comp48589_c0_seq24_4,CL24320Contig2,comp51124_c0_seq22_2,CL60709Contig1,CL8925Contig3,CL3484Contig2,CL24320Contig3,CL61745Contig1,comp68573_c0_seq14_6,comp51421_c0_seq15_1,comp52724_c0_seq7_1,CL27624Contig1	5.11111	1.66227	3.07477
ko04024	cAMP signaling pathway	22	450	320	19732	1.37551e-06	0.000112104	CL1714Contig2,comp67970_c0_seq1_9,CL1Contig535,CL5808Contig1,comp40908_c0_seq2_8,CL7681Contig1,comp49915_c0_seq1_6,comp54841_c0_seq10_8,CL35134Contig1,comp53358_c0_seq2_4,CL52945Contig1,comp66550_c0_seq5_5,CL27899Contig1,CL12Contig5,CL569Contig5,CL1714Contig3,CL4120Contig2,CL2Contig1,CL83914Contig1,CL16134Contig1,CL569Contig4,CL22366Contig1	4.88889	1.62173	3.01461
ko00564	Glycerophospholipid metabolism	26	450	441	19732	3.68742e-06	0.00020035	CL31353Contig1,CL24320Contig4,comp40908_c0_seq2_8,CL1000Contig9,comp53193_c0_seq1_1,CL24320Contig1,comp48849_c1_seq2_1,CL1000Contig1,CL83415Contig1,CL66464Contig1,CL24320Contig2,comp51124_c0_seq22_2,comp73674_c1_seq3_5,CL12Contig13,CL9483Contig4,comp66550_c0_seq5_5,CL27899Contig1,CL569Contig5,CL24320Contig3,comp51421_c0_seq15_1,CL76992Contig1,comp57618_c0_seq2_4,comp70095_c0_seq18_9,CL569Contig4,…	5.77778	2.23495	2.5852
ko00910	Nitrogen metabolism	14	450	166	19732	6.40839e-06	0.000261142	CL10051Contig2,CL4435Contig1,CL43Contig4,CL43632Contig1,CL72305Contig1,comp60775_c0_seq13_6,comp50491_c0_seq7_7,CL1685Contig4,comp70069_c1_seq16_9,comp48626_c4_seq23_1,CL1Contig807,CL4239Contig2,comp68113_c0_seq21_5,CL1Contig585	3.11111	0.841273	3.6981
ko04070	Phosphatidylinositol signaling system	19	450	320	19732	5.03417e-05	0.00164114	CL24320Contig4,comp67970_c0_seq1_9,CL1Contig535,CL1000Contig9,comp53193_c0_seq1_1,CL24320Contig1,CL7681Contig1,CL1Contig223,CL1000Contig1,comp49915_c0_seq1_6,comp57051_c2_seq1_7,CL24320Contig2,comp51124_c0_seq22_2,CL12Contig5,CL24320Contig3,comp51421_c0_seq15_1,CL4120Contig2,CL22366Contig1,comp52724_c0_seq7_1	4.22222	1.62173	2.60353
ko04014	Ras signaling pathway	17	450	284	19732	9.93764e-05	0.00269972	comp67970_c0_seq1_9,CL1Contig535,comp40908_c0_seq2_8,CL7681Contig1,comp49915_c0_seq1_6,comp54841_c0_seq10_8,comp66550_c0_seq5_5,CL27899Contig1,CL12Contig5,CL569Contig5,CL4120Contig2,CL2Contig1,CL83914Contig1,CL16134Contig1,CL569Contig4,CL22366Contig1,CL9048Contig1	3.77778	1.43929	2.62476
ko00062	Fatty acid elongation	8	450	92	19732	0.000251079	0.00537889	CL11947Contig2,CL1Contig963,comp56400_c1_seq33_4,CL139Contig15,CL139Contig7,CL53216Contig1,CL139Contig9,comp50213_c0_seq1_1	1.77778	0.466248	3.81295
ko01040	Biosynthesis of unsaturated fatty acids	11	450	157	19732	0.000263995	0.00537889	CL11947Contig2,CL5808Contig1,CL55298Contig1,CL1Contig963,CL30720Contig1,comp56400_c1_seq33_4,CL139Contig15,CL139Contig7,CL53342Contig1,CL139Contig9,CL38465Contig1	2.44444	0.795662	3.07222
ko04015	Rap1 signaling pathway	11	450	184	19732	0.00109158	0.0197697	comp67970_c0_seq1_9,CL1Contig535,CL7681Contig1,comp49915_c0_seq1_6,comp54841_c0_seq10_8,CL12Contig5,CL4120Contig2,CL2Contig1,CL83914Contig1,CL16134Contig1,CL22366Contig1	2.44444	0.932495	2.6214
ko04152	AMPK signaling pathway	22	450	516	19732	0.00184283	0.0300382	comp55494_c1_seq3_3,CL55298Contig1,CL30720Contig1,CL89Contig8,CL39295Contig2,CL603Contig6,comp69910_c0_seq21_6,CL35134Contig1,comp53358_c0_seq2_4,CL55295Contig1,CL497Contig2,CL52945Contig1,CL13887Contig1,CL4664Contig3,CL53285Contig1,comp52830_c0_seq1_8,CL79818Contig1,CL6340Contig1,CL38465Contig1,CL44546Contig1,CL32406Contig1,CL7779Contig2	4.88889	2.61504	1.86953
ko00190	Oxidative phosphorylation	24	450	584	19732	0.00205738	0.0302018	CL63223Contig1,CL63151Contig1,CL83156Contig1,CL2Contig189,CL54820Contig1,comp49823_c0_seq7_1,CL1392Contig2,CL65237Contig1,CL2Contig104,CL30642Contig1,CL56034Contig1,CL81843Contig1,CL2Contig141,CL2Contig228,CL88404Contig1,CL2Contig281,CL82213Contig1,CL65709Contig1,CL81330Contig1,CL82423Contig1,CL4Contig43,CL54652Contig1,CL4Contig18,comp54433_c2_seq7_7	5.33333	2.95966	1.80201
ko00791	Atrazine degradation	2	450	12	19732	0.00222344	0.0302018	CL54319Contig1,CL52216Contig1	0.444444	0.0608149	7.30815
ko04022	cGMP - PKG signaling pathway	13	450	260	19732	0.00270307	0.0302113	CL1714Contig2,comp67970_c0_seq1_9,CL1845Contig6,CL1Contig535,CL7681Contig1,comp49915_c0_seq1_6,comp54841_c0_seq10_8,CL45292Contig1,CL12Contig5,CL1714Contig3,CL4120Contig2,CL2Contig1,CL22366Contig1	2.88889	1.31766	2.19244
ko00361	Chlorocyclohexane and chlorobenzene degradation	1	450	4	19732	0.00302032	0.0302113	CL17231Contig1	0.222222	0.0202716	10.9622
ko00364	Fluorobenzoate degradation	1	450	4	19732	0.00302032	0.0302113	CL17231Contig1	0.222222	0.0202716	10.9622
ko00623	Toluene degradation	1	450	4	19732	0.00302032	0.0302113	CL17231Contig1	0.222222	0.0202716	10.9622
ko00660	C5-Branched dibasic acid metabolism	4	450	44	19732	0.00315088	0.0302113	comp59308_c1_seq67_4,comp72884_c0_seq1_5,CL4404Contig3,CL4404Contig2	0.888889	0.222988	3.98626
ko00944	Flavone and flavonol biosynthesis	3	450	28	19732	0.00354105	0.0320662	CL57907Contig1,CL55399Contig1,CL43773Contig1	0.666667	0.141901	4.6981
ko00471	D-Glutamine and D-glutamate metabolism	2	450	15	19732	0.00437059	0.0374951	CL72305Contig1,CL4239Contig2	0.444444	0.0760186	5.84652
ko00401	Novobiocin biosynthesis	2	450	17	19732	0.00631488	0.0514662	comp57834_c1_seq5_5,CL1085Contig2	0.444444	0.0861545	5.15869
Nf vs. Nl up regulated
ID	#Pathway	DEG	DEG_all	Gene	Gene_all	p-value	FDR	GeneID	Cluster_frequency(%)	Genome_frequency(%)	Enrichment_score
ko00910	Nitrogen metabolism	6	82	166	19732	5.88024e-06	0.000470419	CL4435Contig1,CL72305Contig1,CL1685Contig4,CL4239Contig2,comp68113_c0_seq21_5,CL1Contig585	7.31707	0.841273	8.69762
ko00471	D-Glutamine and D-glutamate metabolism	2	82	15	19732	3.03593e-05	0.00121437	CL72305Contig1,CL4239Contig2	2.43902	0.0760186	32.0846
ko00565	Ether lipid metabolism	4	82	132	19732	0.000224278	0.00598075	comp73674_c1_seq3_5,comp66550_c0_seq5_5,CL27899Contig1,CL569Contig4	4.87805	0.668964	7.29194
ko00363	Bisphenol degradation	2	82	45	19732	0.000865457	0.0138473	CL27495Contig1,CL1468Contig2	2.43902	0.228056	10.6949
ko00624	Polycyclic aromatic hydrocarbon degradation	2	82	45	19732	0.000865457	0.0138473	CL27495Contig1,CL1468Contig2	2.43902	0.228056	10.6949
ko00791	Atrazine degradation	1	82	12	19732	0.00109593	0.0146124	CL54319Contig1	1.21951	0.0608149	20.0528
ko00630	Glyoxylate and dicarboxylate metabolism	5	82	298	19732	0.00151093	0.0172678	CL85820Contig1,comp49162_c0_seq39_4,CL1685Contig4,CL2108Contig2,comp23507_c0_seq1_8	6.09756	1.51024	4.03749
ko00627	Aminobenzoate degradation	2	82	58	19732	0.00181032	0.0181032	CL27495Contig1,CL1468Contig2	2.43902	0.293939	8.29773
ko00564	Glycerophospholipid metabolism	6	82	441	19732	0.00238963	0.0212412	CL66464Contig1,comp73674_c1_seq3_5,comp66550_c0_seq5_5,CL27899Contig1,CL76992Contig1,CL569Contig4	7.31707	2.23495	3.27393
ko00903	Limonene and pinene degradation	2	82	72	19732	0.00335624	0.0268499	CL27495Contig1,CL1468Contig2	2.43902	0.36489	6.68428
ko00250	Alanine, aspartate and glutamate metabolism	4	82	264	19732	0.00487517	0.0344621	comp54604_c0_seq27_3,CL72305Contig1,comp23507_c0_seq1_8,CL4239Contig2	4.87805	1.33793	3.64597
ko01200	Carbon metabolism	10	82	1104	19732	0.00584534	0.0344621	CL89045Contig1,CL85820Contig1,CL72305Contig1,CL5189Contig3,comp49162_c0_seq39_4,CL1685Contig4,CL88933Contig1,CL2108Contig2,comp23507_c0_seq1_8,CL4239Contig2	12.1951	5.59497	2.17966
ko00944	Flavone and flavonol biosynthesis	1	82	28	19732	0.00601204	0.0344621	CL57907Contig1	1.21951	0.141901	8.59408
ko04630	Jak-STAT signaling pathway	1	82	29	19732	0.00644006	0.0344621	CL11921Contig3	1.21951	0.146969	8.29773
ko00670	One carbon pool by folate	2	82	91	19732	0.00646165	0.0344621	comp51578_c1_seq60_1,CL5189Contig3	2.43902	0.46118	5.28866
ko00680	Methane metabolism	3	82	219	19732	0.0131637	0.0635517	CL89045Contig1,CL88933Contig1,comp23507_c0_seq1_8	3.65854	1.10987	3.29636
ko01212	Fatty acid metabolism	4	82	339	19732	0.0135047	0.0635517	CL1Contig963,CL38465Contig1,CL75839Contig1,comp72291_c0_seq3_5	4.87805	1.71802	2.83934
ko00941	Flavonoid biosynthesis	2	82	125	19732	0.0152856	0.0679358	CL57907Contig1,CL30941Contig1	2.43902	0.633489	3.85015
ko00945	Stilbenoid, diarylheptanoid and gingerol biosynthesis	2	82	129	19732	0.0166163	0.0699633	CL27495Contig1,CL1468Contig2	2.43902	0.65376	3.73076
ko00051	Fructose and mannose metabolism	3	82	246	19732	0.0193371	0.0773486	CL89045Contig1,CL58998Contig1,CL88933Contig1	3.65854	1.24671	2.93456
Nf vs. Nl down regulated
ID	#Pathway	DEG	DEG_all	Gene	Gene_all	p-value	FDR	GeneID	Cluster_frequency(%)	Genome_frequency(%)	Enrichment_score
ko00561	Glycerolipid metabolism	23	368	328	19732	1.40056e-08	2.19888e-06	CL24320Contig4,CL8382Contig2,CL59272Contig1,CL37563Contig1,CL1000Contig9,comp53193_c0_seq1_1,CL45293Contig1,CL24320Contig1,CL1000Contig1,CL83415Contig1,comp55516_c0_seq64_7,comp48589_c0_seq24_4,CL24320Contig2,comp51124_c0_seq22_2,CL60709Contig1,CL8925Contig3,CL3484Contig2,CL24320Contig3,CL61745Contig1,comp68573_c0_seq14_6,comp51421_c0_seq15_1,comp52724_c0_seq7_1,CL27624Contig1	6.25	1.66227	3.75991
ko04024	cAMP signaling pathway	19	368	320	19732	2.71043e-06	0.000141846	CL1714Contig2,comp67970_c0_seq1_9,CL1Contig535,CL5808Contig1,comp40908_c0_seq2_8,CL7681Contig1,comp49915_c0_seq1_6,comp54841_c0_seq10_8,CL35134Contig1,comp53358_c0_seq2_4,CL52945Contig1,CL12Contig5,CL569Contig5,CL1714Contig3,CL4120Contig2,CL2Contig1,CL83914Contig1,CL16134Contig1,CL22366Contig1	5.16304	1.62173	3.18366
ko04070	Phosphatidylinositol signaling system	19	368	320	19732	2.71043e-06	0.000141846	CL24320Contig4,comp67970_c0_seq1_9,CL1Contig535,CL1000Contig9,comp53193_c0_seq1_1,CL24320Contig1,CL7681Contig1,CL1Contig223,CL1000Contig1,comp49915_c0_seq1_6,comp57051_c2_seq1_7,CL24320Contig2,comp51124_c0_seq22_2,CL12Contig5,CL24320Contig3,comp51421_c0_seq15_1,CL4120Contig2,CL22366Contig1,comp52724_c0_seq7_1	5.16304	1.62173	3.18366
ko00564	Glycerophospholipid metabolism	20	368	441	19732	9.06813e-05	0.00355924	CL31353Contig1,CL24320Contig4,comp40908_c0_seq2_8,CL1000Contig9,comp53193_c0_seq1_1,CL24320Contig1,comp48849_c1_seq2_1,CL1000Contig1,CL83415Contig1,CL24320Contig2,comp51124_c0_seq22_2,CL12Contig13,CL9483Contig4,CL569Contig5,CL24320Contig3,comp51421_c0_seq15_1,comp57618_c0_seq2_4,comp70095_c0_seq18_9,comp52724_c0_seq7_1,CL14808Contig1	5.43478	2.23495	2.43173
ko04015	Rap1 signaling pathway	11	368	184	19732	0.000182543	0.00573186	comp67970_c0_seq1_9,CL1Contig535,CL7681Contig1,comp49915_c0_seq1_6,comp54841_c0_seq10_8,CL12Contig5,CL4120Contig2,CL2Contig1,CL83914Contig1,CL16134Contig1,CL22366Contig1	2.98913	0.932495	3.20552
ko04014	Ras signaling pathway	14	368	284	19732	0.000307769	0.00724677	comp67970_c0_seq1_9,CL1Contig535,comp40908_c0_seq2_8,CL7681Contig1,comp49915_c0_seq1_6,comp54841_c0_seq10_8,CL12Contig5,CL569Contig5,CL4120Contig2,CL2Contig1,CL83914Contig1,CL16134Contig1,CL22366Contig1,CL9048Contig1	3.80435	1.43929	2.64322
ko00062	Fatty acid elongation	7	368	92	19732	0.000323105	0.00724677	CL11947Contig2,comp56400_c1_seq33_4,CL139Contig15,CL139Contig7,CL53216Contig1,CL139Contig9,comp50213_c0_seq1_1	1.90217	0.466248	4.07975
ko04152	AMPK signaling pathway	20	368	516	19732	0.000741425	0.0130171	comp55494_c1_seq3_3,CL55298Contig1,CL30720Contig1,CL89Contig8,CL39295Contig2,CL603Contig6,comp69910_c0_seq21_6,CL35134Contig1,comp53358_c0_seq2_4,CL55295Contig1,CL497Contig2,CL52945Contig1,CL13887Contig1,CL4664Contig3,CL53285Contig1,comp52830_c0_seq1_8,CL6340Contig1,CL44546Contig1,CL32406Contig1,CL7779Contig2	5.43478	2.61504	2.07828
ko01040	Biosynthesis of unsaturated fatty acids	9	368	157	19732	0.000746202	0.0130171	CL11947Contig2,CL5808Contig1,CL55298Contig1,CL30720Contig1,comp56400_c1_seq33_4,CL139Contig15,CL139Contig7,CL53342Contig1,CL139Contig9	2.44565	0.795662	3.07373
ko04022	cGMP - PKG signaling pathway	12	368	260	19732	0.00125904	0.0187268	CL1714Contig2,comp67970_c0_seq1_9,CL1Contig535,CL7681Contig1,comp49915_c0_seq1_6,comp54841_c0_seq10_8,CL45292Contig1,CL12Contig5,CL1714Contig3,CL4120Contig2,CL2Contig1,CL22366Contig1	3.26087	1.31766	2.47475
ko00660	C5-Branched dibasic acid metabolism	4	368	44	19732	0.00131207	0.0187268	comp59308_c1_seq67_4,comp72884_c0_seq1_5,CL4404Contig3,CL4404Contig2	1.08696	0.222988	4.87451
ko00361	Chlorocyclohexane and chlorobenzene degradation	1	368	4	19732	0.00203023	0.0227675	CL17231Contig1	0.271739	0.0202716	13.4049
ko00364	Fluorobenzoate degradation	1	368	4	19732	0.00203023	0.0227675	CL17231Contig1	0.271739	0.0202716	13.4049
ko00623	Toluene degradation	1	368	4	19732	0.00203023	0.0227675	CL17231Contig1	0.271739	0.0202716	13.4049
ko00360	Phenylalanine metabolism	8	368	158	19732	0.00291288	0.0304881	CL41394Contig1,comp48742_c0_seq1_1,CL1575Contig3,comp57834_c1_seq5_5,CL1Contig1216,CL9658Contig1,CL1085Contig2,CL71Contig2	2.17391	0.80073	2.71491
ko00190	Oxidative phosphorylation	20	368	584	19732	0.00332695	0.031422	CL63223Contig1,CL63151Contig1,CL83156Contig1,CL2Contig189,comp49823_c0_seq7_1,CL1392Contig2,CL65237Contig1,CL2Contig104,CL30642Contig1,CL56034Contig1,CL81843Contig1,CL2Contig141,CL2Contig228,CL82213Contig1,CL65709Contig1,CL81330Contig1,CL4Contig43,CL54652Contig1,CL4Contig18,comp54433_c2_seq7_7	5.43478	2.95966	1.83629
ko00650	Butanoate metabolism	6	368	105	19732	0.00353541	0.031422	comp59308_c1_seq67_4,comp72884_c0_seq1_5,CL4404Contig3,CL4404Contig2,CL62Contig12,CL40159Contig1	1.63043	0.532131	3.06398
ko00401	Novobiocin biosynthesis	2	368	17	19732	0.00360253	0.031422	comp57834_c1_seq5_5,CL1085Contig2	0.543478	0.0861545	6.30818
ko00910	Nitrogen metabolism	8	368	166	19732	0.00403988	0.0333822	CL10051Contig2,CL43Contig4,CL43632Contig1,comp60775_c0_seq13_6,comp50491_c0_seq7_7,comp70069_c1_seq16_9,comp48626_c4_seq23_1,CL1Contig807	2.17391	0.841273	2.58408
ko00920	Sulfur metabolism	6	368	122	19732	0.00796768	0.0625463	CL59049Contig1,comp52166_c0_seq3_8,CL3573Contig1,CL1583Contig4,CL47809Contig1,CL10607Contig1	1.63043	0.618285	2.63703
Nl vs. N0 up/down regulated
ID	#Pathway	DEG	DEG_all	Gene	Gene_all	p-value	FDR	GeneID	Cluster_frequency(%)	Genome_frequency(%)	Enrichment_score
ko00360	Phenylalanine metabolism	18	671	158	19732	1.86375e-06	0.000301578	comp49540_c1_seq2_2,CL7426Contig1,CL41394Contig1,comp68852_c0_seq4_9,CL77993Contig1,comp46060_c0_seq1_1,comp50646_c0_seq2_7,CL6229Contig2,CL1085Contig4,CL1Contig60,comp54422_c1_seq2_3,comp57834_c1_seq5_5,CL55940Contig1,comp62055_c1_seq1_8,CL1Contig1216,CL1Contig901,comp58711_c0_seq1_4,CL1085Contig2	2.68256	0.80073	3.35015
ko00910	Nitrogen metabolism	18	671	166	19732	3.91246e-06	0.000301578	comp66490_c0_seq1_5,CL4435Contig1,comp47184_c0_seq1_3,CL1620Contig2,CL72305Contig1,comp15522_c0_seq1_2,comp55241_c1_seq23_3,comp60775_c0_seq13_6,comp56551_c1_seq2_4,CL5744Contig3,CL1685Contig4,comp70069_c1_seq16_9,CL9950Contig1,CL18154Contig1,CL1Contig585,CL4738Contig2,CL4435Contig2,CL21911Contig1	2.68256	0.841273	3.1887
ko00830	Retinol metabolism	11	671	72	19732	5.14053e-06	0.000301578	CL13363Contig1,comp70291_c0_seq7_9,CL12341Contig1,comp46456_c2_seq1_2,CL2313Contig2,comp44885_c0_seq1_7,CL17674Contig1,CL3782Contig2,CL47548Contig1,CL10603Contig1,comp71153_c1_seq3_5	1.63934	0.36489	4.49271
ko00940	Phenylpropanoid biosynthesis	30	671	383	19732	8.13087e-06	0.000357758	comp49540_c1_seq2_2,CL18771Contig1,CL70761Contig1,CL41394Contig1,comp68852_c0_seq4_9,CL5156Contig3,CL767Contig2,CL1613Contig2,comp46060_c0_seq1_1,comp50646_c0_seq2_7,comp54770_c0_seq5_4,CL15395Contig1,CL25887Contig1,comp65024_c0_seq1_5,CL1Contig60,comp54422_c1_seq2_3,CL52872Contig1,CL26458Contig1,CL13039Contig1,CL82037Contig1,CL1116Contig4,CL26098Contig1,comp62055_c1_seq1_8,CL209Contig8,CL2259Con…	4.47094	1.94101	2.30341
ko00906	Carotenoid biosynthesis	16	671	155	19732	2.19451e-05	0.000772469	comp54979_c5_seq58_3,CL65079Contig1,CL16621Contig2,CL64Contig21,CL11408Contig1,comp75101_c1_seq28_9,comp49340_c0_seq2_1,comp69563_c2_seq8_5,CL20293Contig1,CL43047Contig1,CL9277Contig1,comp71068_c0_seq4_9,CL3530Contig1,comp74559_c1_seq21_9,comp55768_c0_seq4_7,CL17430Contig1	2.3845	0.785526	3.03555
ko00904	Diterpenoid biosynthesis	9	671	63	19732	4.85317e-05	0.0014236	comp58130_c2_seq1_4,CL83252Contig1,CL980Contig3,CL2652Contig1,CL25255Contig1,CL26000Contig1,CL7486Contig2,CL25005Contig1,CL2749Contig1	1.34128	0.319278	4.20098
ko04064	NF-kappa B signaling pathway	11	671	102	19732	0.0001788	0.00385702	CL17160Contig1,CL30074Contig1,CL4835Contig3,comp66802_c0_seq14_6,CL6930Contig4,CL79519Contig1,CL51730Contig1,comp73031_c1_seq111_5,CL6930Contig2,CL40818Contig1,CL4835Contig1	1.63934	0.516927	3.17133
ko00140	Steroid hormone biosynthesis	5	671	26	19732	0.000194468	0.00385702	comp70291_c0_seq7_9,comp46456_c2_seq1_2,CL2313Contig2,CL17674Contig1,CL15490Contig1	0.745156	0.131766	5.65516
ko00401	Novobiocin biosynthesis	4	671	17	19732	0.000197234	0.00385702	CL77993Contig1,CL1085Contig4,comp57834_c1_seq5_5,CL1085Contig2	0.596125	0.0861545	6.91926
ko00900	Terpenoid backbone biosynthesis	19	671	244	19732	0.000270517	0.00476109	comp43671_c0_seq4_1,comp59962_c0_seq1_4,CL870Contig2,comp47624_c0_seq1_4,CL540Contig1,CL8090Contig1,CL1195Contig3,CL497Contig2,CL35976Contig1,CL1195Contig2,comp54258_c0_seq3_4,CL540Contig3,CL10410Contig2,CL589Contig4,CL28921Contig1,CL76937Contig1,CL35318Contig1,CL84421Contig1,CL34482Contig1	2.83159	1.23657	2.28988
ko00941	Flavonoid biosynthesis	12	671	125	19732	0.000336928	0.00539085	comp49540_c1_seq2_2,CL70761Contig1,CL5156Contig3,CL767Contig2,CL2351Contig2,CL57907Contig1,CL1613Contig2,CL61358Contig1,comp54422_c1_seq2_3,CL13039Contig1,CL1Contig901,CL68226Contig1	1.78838	0.633489	2.82306
ko00943	Isoflavonoid biosynthesis	2	671	5	19732	0.000371923	0.00545488	CL8828Contig1,CL63016Contig1	0.298063	0.0253395	11.7627
ko00960	Tropane, piperidine and pyridine alkaloid biosynthesis	8	671	73	19732	0.000802002	0.0108579	CL7426Contig1,CL77993Contig1,CL6229Contig2,CL1085Contig4,comp57834_c1_seq5_5,CL55940Contig1,comp58711_c0_seq1_4,CL1085Contig2	1.19225	0.369957	3.22267
ko00980	Metabolism of xenobiotics by cytochrome P450	13	671	156	19732	0.000903677	0.0113605	CL33129Contig1,CL10177Contig1,comp70291_c0_seq7_9,CL39425Contig1,comp46456_c2_seq1_2,CL2313Contig2,comp69277_c0_seq8_6,comp74065_c2_seq1_5,CL17674Contig1,CL20803Contig1,CL10603Contig1,CL1Contig1589,CL1Contig413	1.93741	0.790594	2.45057
ko00908	Zeatin biosynthesis	8	671	75	19732	0.000977083	0.0114644	CL15680Contig2,comp56396_c0_seq2_4,CL1834Contig3,comp62685_c0_seq1_5,CL30684Contig1,CL47650Contig1,CL3023Contig1,CL26495Contig2	1.19225	0.380093	3.13673
ko00520	Amino sugar and nucleotide sugar metabolism	27	671	456	19732	0.00200453	0.021275	CL58998Contig1,CL1Contig1772,comp44180_c0_seq5_1,CL244Contig2,comp59432_c3_seq1_4,CL15564Contig1,CL1Contig1513,CL1Contig1784,CL1670Contig1,CL5602Contig2,CL16992Contig1,comp54594_c0_seq9_3,CL1Contig884,CL1396Contig3,CL88271Contig1,CL5285Contig1,comp52521_c0_seq1_6,comp52399_c2_seq17_2,CL64571Contig1,CL2212Contig2,CL40470Contig1,CL15223Contig1,CL76Contig11,CL23347Contig1,CL11675Contig3,CL34791Conti…	4.02385	2.31097	1.7412
ko04390	Hippo signaling pathway	13	671	170	19732	0.00205497	0.021275	CL17614Contig1,CL1714Contig2,comp48247_c0_seq2_7,CL52048Contig1,CL52465Contig1,CL32088Contig1,CL52516Contig1,CL77984Contig1,CL29681Contig1,CL34463Contig1,CL1714Contig3,CL33466Contig1,comp67526_c0_seq5_5	1.93741	0.861545	2.24876
ko00944	Flavone and flavonol biosynthesis	4	671	28	19732	0.00229883	0.0224775	CL2351Contig2,CL57907Contig1,CL61358Contig1,CL68226Contig1	0.596125	0.141901	4.20098
ko04510	Focal adhesion	13	671	174	19732	0.00254853	0.0236074	CL51531Contig1,CL1714Contig2,CL52048Contig1,CL52465Contig1,CL77984Contig1,comp55163_c1_seq1_8,CL54407Contig1,CL3650Contig3,CL86589Contig1,CL1714Contig3,CL66616Contig1,CL39640Contig1,CL3650Contig2	1.93741	0.881816	2.19706
ko02010	ABC transporters	15	671	217	19732	0.0031621	0.0278264	CL776Contig3,CL5999Contig2,comp74194_c2_seq28_5,comp15435_c0_seq2_3,comp58261_c0_seq80_4,CL1027Contig4,CL36752Contig1,comp52737_c0_seq5_5,CL5077Contig2,CL248Contig4,CL63603Contig1,CL2125Contig4,CL6926Contig1,CL6926Contig2,CL45618Contig1	2.23547	1.09974	2.03273
Nl vs. N0 up regulated
ID	#Pathway	DEG	DEG_all	Gene	Gene_all	p-value	FDR	GeneID	Cluster_frequency(%)	Genome_frequency(%)	Enrichment_score
ko00940	Phenylpropanoid biosynthesis	29	213	383	19732	1.7654e-17	2.03021e-15	comp49540_c1_seq2_2,CL18771Contig1,CL70761Contig1,CL41394Contig1,comp68852_c0_seq4_9,CL5156Contig3,CL767Contig2,CL1613Contig2,comp46060_c0_seq1_1,comp50646_c0_seq2_7,comp54770_c0_seq5_4,CL15395Contig1,CL25887Contig1,comp65024_c0_seq1_5,CL1Contig60,comp54422_c1_seq2_3,CL52872Contig1,CL26458Contig1,CL13039Contig1,CL82037Contig1,CL26098Contig1,comp62055_c1_seq1_8,CL209Contig8,CL2259Contig2,CL1Contig…	13.615	1.94101	7.0144
ko00360	Phenylalanine metabolism	17	213	158	19732	1.09513e-13	6.29702e-12	comp49540_c1_seq2_2,CL7426Contig1,CL41394Contig1,comp68852_c0_seq4_9,comp46060_c0_seq1_1,comp50646_c0_seq2_7,CL6229Contig2,CL1085Contig4,CL1Contig60,comp54422_c1_seq2_3,comp57834_c1_seq5_5,CL55940Contig1,comp62055_c1_seq1_8,CL1Contig1216,CL1Contig901,comp58711_c0_seq1_4,CL1085Contig2	7.98122	0.80073	9.96743
ko00900	Terpenoid backbone biosynthesis	15	213	244	19732	1.01304e-08	3.88333e-07	comp59962_c0_seq1_4,CL870Contig2,comp47624_c0_seq1_4,CL540Contig1,CL8090Contig1,CL1195Contig3,CL497Contig2,CL35976Contig1,CL1195Contig2,comp54258_c0_seq3_4,CL540Contig3,CL10410Contig2,CL589Contig4,CL28921Contig1,CL35318Contig1	7.04225	1.23657	5.69499
ko00904	Diterpenoid biosynthesis	8	213	63	19732	2.40101e-08	6.90289e-07	comp58130_c2_seq1_4,CL83252Contig1,CL980Contig3,CL2652Contig1,CL25255Contig1,CL26000Contig1,CL25005Contig1,CL2749Contig1	3.75587	0.319278	11.7636
ko00960	Tropane, piperidine and pyridine alkaloid biosynthesis	7	213	73	19732	1.19016e-06	2.73736e-05	CL7426Contig1,CL6229Contig2,CL1085Contig4,comp57834_c1_seq5_5,CL55940Contig1,comp58711_c0_seq1_4,CL1085Contig2	3.28638	0.369957	8.88314
ko00941	Flavonoid biosynthesis	8	213	125	19732	8.71e-06	0.00016073	comp49540_c1_seq2_2,CL70761Contig1,CL5156Contig3,CL767Contig2,CL1613Contig2,comp54422_c1_seq2_3,CL13039Contig1,CL1Contig901	3.75587	0.633489	5.92886
ko00945	Stilbenoid, diarylheptanoid and gingerol biosynthesis	8	213	129	19732	1.12476e-05	0.00016073	comp49540_c1_seq2_2,CL70761Contig1,CL5156Contig3,CL767Contig2,CL1613Contig2,comp54422_c1_seq2_3,CL13039Contig1,CL1Contig901	3.75587	0.65376	5.74502
ko00943	Isoflavonoid biosynthesis	2	213	5	19732	1.22065e-05	0.00016073	CL8828Contig1,CL63016Contig1	0.938967	0.0253395	37.0554
ko00830	Retinol metabolism	6	213	72	19732	1.25788e-05	0.00016073	comp70291_c0_seq7_9,comp46456_c2_seq1_2,CL2313Contig2,comp44885_c0_seq1_7,CL3782Contig2,comp71153_c1_seq3_5	2.8169	0.36489	7.71987
ko00950	Isoquinoline alkaloid biosynthesis	7	213	104	19732	1.71348e-05	0.00019705	CL7426Contig1,CL6229Contig2,CL1085Contig4,comp57834_c1_seq5_5,CL55940Contig1,comp58711_c0_seq1_4,CL1085Contig2	3.28638	0.527063	6.23528
ko00400	Phenylalanine, tyrosine and tryptophan biosynthesis	8	213	142	19732	2.42955e-05	0.000253998	CL6229Contig2,CL9577Contig1,CL1085Contig4,comp37792_c0_seq1_1,comp57834_c1_seq5_5,CL55940Contig1,CL1085Contig2,CL299Contig4	3.75587	0.719643	5.21907
ko00401	Novobiocin biosynthesis	3	213	17	19732	2.81371e-05	0.000269647	CL1085Contig4,comp57834_c1_seq5_5,CL1085Contig2	1.40845	0.0861545	16.348
ko00909	Sesquiterpenoid and triterpenoid biosynthesis	6	213	98	19732	9.32419e-05	0.000824833	CL4428Contig3,comp54289_c0_seq3_4,comp68111_c0_seq1_5,comp57652_c1_seq1_4,CL13075Contig1,CL1055Contig2	2.8169	0.496655	5.67174
ko00140	Steroid hormone biosynthesis	3	213	26	19732	0.000163779	0.00134533	comp70291_c0_seq7_9,comp46456_c2_seq1_2,CL2313Contig2	1.40845	0.131766	10.6891
ko01051	Biosynthesis of ansamycins	2	213	12	19732	0.000253926	0.00194677	comp54014_c0_seq1_1,CL674Contig4	0.938967	0.0608149	15.4397
ko00350	Tyrosine metabolism	7	213	170	19732	0.00053127	0.00381851	CL7426Contig1,CL6229Contig2,CL1085Contig4,comp57834_c1_seq5_5,CL55940Contig1,comp58711_c0_seq1_4,CL1085Contig2	3.28638	0.861545	3.81453
ko00902	Monoterpenoid biosynthesis	2	213	20	19732	0.00123457	0.00835154	CL736Contig3,CL6573Contig1	0.938967	0.101358	9.26385
ko00908	Zeatin biosynthesis	4	213	75	19732	0.00130772	0.00835488	comp56396_c0_seq2_4,CL1834Contig3,comp62685_c0_seq1_5,CL3023Contig1	1.87793	0.380093	4.94072
ko00906	Carotenoid biosynthesis	6	213	155	19732	0.00149564	0.00905255	comp54979_c5_seq58_3,comp75101_c1_seq28_9,comp49340_c0_seq2_1,comp69563_c2_seq8_5,CL20293Contig1,comp74559_c1_seq21_9	2.8169	0.785526	3.58601
ko00965	Betalain biosynthesis	1	213	6	19732	0.00169072	0.00972167	comp68808_c2_seq1_5	0.469484	0.0304075	15.4397
Nl vs. N0 down regulated
ID	#Pathway	DEG	DEG_all	Gene	Gene_all	p-value	FDR	GeneID	Cluster_frequency(%)	Genome_frequency(%)	Enrichment_score
ko04064	NF-kappa B signaling pathway	11	458	102	19732	4.3258e-06	0.000726734	CL17160Contig1,CL30074Contig1,CL4835Contig3,comp66802_c0_seq14_6,CL6930Contig4,CL79519Contig1,CL51730Contig1,comp73031_c1_seq111_5,CL6930Contig2,CL40818Contig1,CL4835Contig1	2.40175	0.516927	4.6462
ko00910	Nitrogen metabolism	13	458	166	19732	3.43089e-05	0.00288195	comp66490_c0_seq1_5,CL4435Contig1,comp47184_c0_seq1_3,CL72305Contig1,comp56551_c1_seq2_4,CL5744Contig3,CL1685Contig4,CL9950Contig1,CL18154Contig1,CL1Contig585,CL4738Contig2,CL4435Contig2,CL21911Contig1	2.83843	0.841273	3.37397
ko00061	Fatty acid biosynthesis	12	458	165	19732	0.00012998	0.00727886	CL17862Contig1,CL33664Contig1,CL17862Contig2,CL8378Contig1,CL66738Contig1,CL14791Contig1,CL45048Contig1,CL284Contig7,comp33812_c0_seq3_1,CL75839Contig1,CL284Contig8,CL78Contig2	2.62009	0.836205	3.13331
ko03050	Proteasome	16	458	267	19732	0.000179695	0.00754717	CL53835Contig1,CL27207Contig1,CL54009Contig1,CL17543Contig1,CL28021Contig1,CL86588Contig1,CL43168Contig1,CL46368Contig1,CL38781Contig1,comp58230_c0_seq3_9,CL84679Contig1,CL41112Contig1,CL83572Contig1,CL83732Contig1,CL32074Contig2,CL58437Contig1	3.49345	1.35313	2.58175
ko00531	Glycosaminoglycan degradation	7	458	77	19732	0.000410731	0.0116664	CL99Contig6,CL19270Contig2,comp61889_c1_seq31_8,comp57404_c0_seq16_7,CL19270Contig1,CL32873Contig1,CL31334Contig2	1.52838	0.390229	3.91663
ko00944	Flavone and flavonol biosynthesis	4	458	28	19732	0.000416659	0.0116664	CL2351Contig2,CL57907Contig1,CL61358Contig1,CL68226Contig1	0.873362	0.141901	6.15471
ko04510	Focal adhesion	11	458	174	19732	0.000780557	0.0187334	CL51531Contig1,CL52048Contig1,CL52465Contig1,CL77984Contig1,comp55163_c1_seq1_8,CL54407Contig1,CL3650Contig3,CL86589Contig1,CL66616Contig1,CL39640Contig1,CL3650Contig2	2.40175	0.881816	2.72364
ko00906	Carotenoid biosynthesis	10	458	155	19732	0.00101139	0.0191687	CL65079Contig1,CL16621Contig2,CL64Contig21,CL11408Contig1,CL43047Contig1,CL9277Contig1,comp71068_c0_seq4_9,CL3530Contig1,comp55768_c0_seq4_7,CL17430Contig1	2.18341	0.785526	2.77955
ko01212	Fatty acid metabolism	17	458	339	19732	0.00102689	0.0191687	CL17862Contig1,CL33664Contig1,CL1Contig520,CL17862Contig2,CL8378Contig1,CL30769Contig2,CL66738Contig1,CL14791Contig1,CL46960Contig1,CL45048Contig1,CL284Contig7,CL15490Contig1,CL19454Contig2,comp33812_c0_seq3_1,CL75839Contig1,CL284Contig8,CL78Contig2	3.71179	1.71802	2.1605
ko01053	Biosynthesis of siderophore group nonribosomal peptides	1	458	3	19732	0.00158796	0.0266777	comp67115_c0_seq2_5	0.218341	0.0152037	14.361
ko04390	Hippo signaling pathway	10	458	170	19732	0.00212129	0.0323979	comp48247_c0_seq2_7,CL52048Contig1,CL52465Contig1,CL32088Contig1,CL52516Contig1,CL77984Contig1,CL29681Contig1,CL34463Contig1,CL33466Contig1,comp67526_c0_seq5_5	2.18341	0.861545	2.53429
ko00340	Histidine metabolism	6	458	81	19732	0.00275102	0.0361618	CL89465Contig1,CL12387Contig1,CL39503Contig1,CL419Contig5,CL419Contig6,CL419Contig3	1.31004	0.410501	3.19133
ko04142	Lysosome	16	458	342	19732	0.00279824	0.0361618	CL99Contig6,CL40836Contig2,CL60340Contig1,CL19270Contig2,CL54820Contig1,CL34004Contig1,comp61889_c1_seq31_8,CL11956Contig1,CL53015Contig1,comp57404_c0_seq16_7,CL40445Contig1,CL19270Contig1,CL79007Contig1,CL32873Contig1,CL31334Contig2,comp21228_c0_seq1_7	3.49345	1.73323	2.01558
ko00980	Metabolism of xenobiotics by cytochrome P450	9	458	156	19732	0.0035557	0.0426684	CL33129Contig1,CL10177Contig1,CL39425Contig1,comp69277_c0_seq8_6,comp74065_c2_seq1_5,CL17674Contig1,CL20803Contig1,CL10603Contig1,CL1Contig413	1.96507	0.790594	2.48556
ko04145	Phagosome	19	458	447	19732	0.00415295	0.0459393	CL30384Contig1,CL60340Contig1,CL54820Contig1,CL57906Contig1,CL15575Contig1,CL90770Contig1,CL40584Contig1,CL54407Contig1,CL41043Contig2,CL53015Contig1,CL40445Contig1,CL28272Contig1,CL86589Contig1,CL17900Contig2,CL53890Contig1,CL79007Contig1,CL66616Contig1,CL85539Contig1,comp21228_c0_seq1_7	4.14847	2.26536	1.83127
ko00253	Tetracycline biosynthesis	2	458	15	19732	0.00459154	0.0459393	CL17862Contig1,CL17862Contig2	0.436681	0.0760186	5.7444
ko04152	AMPK signaling pathway	21	458	516	19732	0.00480029	0.0459393	CL61156Contig1,CL25720Contig1,CL52351Contig1,CL15471Contig1,CL78658Contig1,CL15471Contig2,CL29681Contig1,CL14791Contig1,CL89378Contig1,CL55118Contig1,CL34463Contig1,comp57896_c1_seq104_8,comp59105_c0_seq2_5,CL46960Contig1,CL79818Contig1,CL28575Contig1,CL35725Contig1,CL33466Contig1,CL46166Contig1,comp51728_c0_seq2_4,comp67526_c0_seq5_5	4.58515	2.61504	1.75338
ko02010	ABC transporters	11	458	217	19732	0.00492207	0.0459393	CL776Contig3,comp15435_c0_seq2_3,CL1027Contig4,CL36752Contig1,comp52737_c0_seq5_5,CL248Contig4,CL63603Contig1,CL2125Contig4,CL6926Contig1,CL6926Contig2,CL45618Contig1	2.40175	1.09974	2.18393
ko00625	Chloroalkane and chloroalkene degradation	4	458	49	19732	0.0054284	0.0479984	CL89465Contig1,CL12387Contig1,CL39503Contig1,CL10603Contig1	0.873362	0.248328	3.51698
ko00830	Retinol metabolism	5	458	72	19732	0.00650268	0.0546225	CL13363Contig1,CL12341Contig1,CL17674Contig1,CL47548Contig1,CL10603Contig1	1.0917	0.36489	2.99187

## Sheet: Kegg top20 enrichment 75d
Table S8 Top 20 KEGG enrichment pathways involved in N0 vs.Nf, Nl vs.Nf and N0 vs.Nl at 75 DAT
Nf vs. N0 up/down regulated
ID	#Pathway	DEG	DEG_all	Gene	Gene_all	p-value	FDR	GeneID	Cluster_frequency(%)	Genome_frequency(%)	Enrichment_score
ko00910	Nitrogen metabolism	20	641	166	19732	1.07254e-07	1.86622e-05	CL10051Contig2,comp54853_c0_seq10_7,CL14155Contig1,comp50972_c0_seq14_3,comp71591_c0_seq12_5,CL1620Contig2,CL38371Contig1,CL18665Contig2,CL1925Contig1,CL1Contig367,CL4239Contig2,CL1265Contig4,CL1Contig1798,comp68113_c0_seq21_5,CL4738Contig2,comp43382_c0_seq1_1,CL4435Contig2,CL1Contig133,CL6149Contig2,CL52150Contig1	3.12012	0.841273	3.70881
ko00943	Isoflavonoid biosynthesis	3	641	5	19732	5.37541e-06	0.00046766	CL2045Contig1,CL8828Contig1,CL63016Contig1	0.468019	0.0253395	18.4699
ko00940	Phenylpropanoid biosynthesis	28	641	383	19732	2.35821e-05	0.00136776	CL25905Contig1,CL70761Contig1,CL2552Contig3,CL7909Contig1,comp54484_c2_seq1_8,comp57160_c0_seq3_6,CL54498Contig1,comp50646_c0_seq2_7,CL317Contig8,comp65024_c0_seq1_5,comp54422_c1_seq2_3,CL767Contig1,CL16368Contig1,CL1116Contig4,comp27813_c0_seq2_8,CL209Contig8,comp64220_c0_seq2_5,CL2259Contig2,CL12607Contig1,CL1176Contig2,CL2219Contig4,CL72Contig17,CL767Contig3,CL1Contig901,CL10770Contig1,CL134Co…	4.36817	1.94101	2.25047
ko00941	Flavonoid biosynthesis	12	641	125	19732	0.000216939	0.00943684	CL70761Contig1,CL2351Contig2,CL45502Contig1,CL317Contig8,CL25650Contig1,comp54422_c1_seq2_3,CL55399Contig1,CL767Contig1,CL12607Contig1,CL767Contig3,CL1Contig901,CL40541Contig2	1.87207	0.633489	2.95518
ko00791	Atrazine degradation	3	641	12	19732	0.000443438	0.0154316	CL36232Contig1,comp44721_c0_seq13_2,comp64331_c0_seq5_6	0.468019	0.0608149	7.69579
ko00980	Metabolism of xenobiotics by cytochrome P450	13	641	156	19732	0.000579867	0.0168162	CL12688Contig2,CL7907Contig1,CL10177Contig1,comp70291_c0_seq7_9,comp46456_c2_seq1_2,CL2313Contig2,comp40908_c0_seq1_2,comp69277_c0_seq8_6,CL3716Contig3,CL8Contig1,CL1Contig1589,CL1Contig413,CL41824Contig1	2.02808	0.790594	2.56526
ko00471	D-Glutamine and D-glutamate metabolism	3	641	15	19732	0.00113136	0.0281224	CL4239Contig2,CL1265Contig4,comp43382_c0_seq1_1	0.468019	0.0760186	6.15663
ko00944	Flavone and flavonol biosynthesis	4	641	28	19732	0.00188214	0.0409365	CL2351Contig2,CL45502Contig1,CL25650Contig1,CL55399Contig1	0.624025	0.141901	4.39759
ko00900	Terpenoid backbone biosynthesis	16	641	244	19732	0.00269027	0.0520119	comp59962_c0_seq1_4,CL43865Contig1,CL870Contig2,comp47624_c0_seq1_4,CL1142Contig4,CL8090Contig1,CL1195Contig3,CL497Contig2,comp54258_c0_seq3_4,CL83510Contig1,comp69425_c0_seq32_5,CL540Contig3,comp57112_c1_seq1_6,CL589Contig4,CL40159Contig1,CL35318Contig1	2.4961	1.23657	2.01857
ko00902	Monoterpenoid biosynthesis	3	641	20	19732	0.00352987	0.0614197	CL25871Contig3,CL736Contig3,CL6573Contig1	0.468019	0.101358	4.61747
ko00982	Drug metabolism - cytochrome P450	10	641	147	19732	0.00861071	0.118001	CL12688Contig2,CL7907Contig1,CL10177Contig1,comp40908_c0_seq1_2,comp69277_c0_seq8_6,CL3716Contig3,CL8Contig1,CL1Contig1589,CL1Contig413,CL41824Contig1	1.56006	0.744983	2.09409
ko00140	Steroid hormone biosynthesis	3	641	26	19732	0.00933992	0.118001	comp70291_c0_seq7_9,comp46456_c2_seq1_2,CL2313Contig2	0.468019	0.131766	3.5519
ko00945	Stilbenoid, diarylheptanoid and gingerol biosynthesis	9	641	129	19732	0.00945375	0.118001	CL70761Contig1,CL55385Contig1,CL317Contig8,comp54422_c1_seq2_3,CL767Contig1,CL12607Contig1,CL767Contig3,CL1Contig901,CL40541Contig2	1.40406	0.65376	2.14766
ko02020	Two-component system	7	641	91	19732	0.00949436	0.118001	CL10051Contig2,CL14155Contig1,CL43865Contig1,CL3573Contig1,comp69425_c0_seq32_5,CL53540Contig1,CL53590Contig1	1.09204	0.46118	2.36793
ko00480	Glutathione metabolism	17	641	305	19732	0.0111805	0.129694	CL12688Contig2,CL13411Contig2,CL7907Contig1,CL2278Contig2,CL10177Contig1,comp40908_c0_seq1_2,CL54191Contig1,CL60139Contig1,comp69277_c0_seq8_6,CL3716Contig3,CL8Contig1,comp51696_c1_seq8_4,CL55637Contig1,CL1Contig1589,CL1Contig413,CL41824Contig1,CL62567Contig1	2.65211	1.54571	1.71578
ko00660	C5-Branched dibasic acid metabolism	4	641	44	19732	0.0136005	0.147905	comp72884_c0_seq1_5,CL2120Contig1,CL378Contig4,comp51042_c0_seq1_2	0.624025	0.222988	2.79847
ko00905	Brassinosteroid biosynthesis	5	641	63	19732	0.0162847	0.160512	comp64551_c1_seq21_6,CL16735Contig1,CL4922Contig4,CL55387Contig1,CL28933Contig1	0.780031	0.319278	2.44311
ko04150	mTOR signaling pathway	16	641	295	19732	0.0166047	0.160512	comp55494_c1_seq3_3,CL53036Contig1,CL9086Contig2,CL1Contig917,CL89Contig8,CL52337Contig1,CL87791Contig1,comp70111_c0_seq62_6,CL55295Contig1,CL89Contig5,comp48737_c0_seq4_3,CL13887Contig1,CL89Contig6,comp50963_c0_seq1_8,CL6838Contig1,CL41489Contig1	2.4961	1.49503	1.66959
ko00920	Sulfur metabolism	8	641	122	19732	0.0180793	0.160659	CL47809Contig2,CL3573Contig1,CL80613Contig1,CL6791Contig2,CL57973Contig1,comp49246_c0_seq6_3,CL47809Contig1,comp66512_c0_seq1_5	1.24805	0.618285	2.01857
ko04068	FoxO signaling pathway	19	641	370	19732	0.018754	0.160659	comp55494_c1_seq3_3,CL53036Contig1,CL9086Contig2,CL52268Contig1,CL1Contig917,CL89Contig8,CL87791Contig1,CL46400Contig1,comp70111_c0_seq62_6,CL55295Contig1,CL46519Contig1,CL89Contig5,comp48737_c0_seq4_3,comp68081_c2_seq1_9,CL89Contig6,comp50963_c0_seq1_8,CL6838Contig1,CL1Contig1511,comp45446_c0_seq7_2	2.96412	1.87513	1.58076
Nf vs. N0 up regulated
ID	#Pathway	DEG	DEG_all	Gene	Gene_all	p-value	FDR	GeneID	Cluster_frequency(%)	Genome_frequency(%)	Enrichment_score
ko00940	Phenylpropanoid biosynthesis	22	255	383	19732	1.11976e-09	1.54527e-07	CL70761Contig1,CL2552Contig3,CL7909Contig1,comp54484_c2_seq1_8,comp57160_c0_seq3_6,comp50646_c0_seq2_7,CL317Contig8,comp65024_c0_seq1_5,comp54422_c1_seq2_3,CL767Contig1,CL209Contig8,comp64220_c0_seq2_5,CL2259Contig2,CL12607Contig1,CL1176Contig2,CL2219Contig4,CL72Contig17,CL767Contig3,CL1Contig901,CL10770Contig1,CL40541Contig2,CL5516Contig3	8.62745	1.94101	4.44483
ko00910	Nitrogen metabolism	11	255	166	19732	1.75554e-06	0.000121132	CL14155Contig1,CL1620Contig2,CL38371Contig1,CL1Contig367,CL4239Contig2,CL1265Contig4,CL1Contig1798,comp68113_c0_seq21_5,comp43382_c0_seq1_1,CL1Contig133,CL6149Contig2	4.31373	0.841273	5.12762
ko00900	Terpenoid backbone biosynthesis	12	255	244	19732	1.85246e-05	0.000721951	comp59962_c0_seq1_4,CL870Contig2,comp47624_c0_seq1_4,CL8090Contig1,CL1195Contig3,CL497Contig2,comp54258_c0_seq3_4,comp69425_c0_seq32_5,CL540Contig3,comp57112_c1_seq1_6,CL589Contig4,CL35318Contig1	4.70588	1.23657	3.80559
ko00943	Isoflavonoid biosynthesis	2	255	5	19732	2.09261e-05	0.000721951	CL8828Contig1,CL63016Contig1	0.784314	0.0253395	30.9522
ko00471	D-Glutamine and D-glutamate metabolism	3	255	15	19732	3.32428e-05	0.000833839	CL4239Contig2,CL1265Contig4,comp43382_c0_seq1_1	1.17647	0.0760186	15.4761
ko00941	Flavonoid biosynthesis	8	255	125	19732	3.62538e-05	0.000833839	CL70761Contig1,CL317Contig8,comp54422_c1_seq2_3,CL767Contig1,CL12607Contig1,CL767Contig3,CL1Contig901,CL40541Contig2	3.13725	0.633489	4.95235
ko00945	Stilbenoid, diarylheptanoid and gingerol biosynthesis	8	255	129	19732	4.64635e-05	0.000915995	CL70761Contig1,CL317Contig8,comp54422_c1_seq2_3,CL767Contig1,CL12607Contig1,CL767Contig3,CL1Contig901,CL40541Contig2	3.13725	0.65376	4.79878
ko00902	Monoterpenoid biosynthesis	3	255	20	19732	0.000112139	0.0019344	CL25871Contig3,CL736Contig3,CL6573Contig1	1.17647	0.101358	11.6071
ko00140	Steroid hormone biosynthesis	3	255	26	19732	0.000325568	0.00499204	comp70291_c0_seq7_9,comp46456_c2_seq1_2,CL2313Contig2	1.17647	0.131766	8.92851
ko00791	Atrazine degradation	2	255	12	19732	0.000430464	0.00594041	comp44721_c0_seq13_2,comp64331_c0_seq5_6	0.784314	0.0608149	12.8967
ko00360	Phenylalanine metabolism	7	255	158	19732	0.00106107	0.0133116	CL7426Contig1,comp50646_c0_seq2_7,CL317Contig8,comp54422_c1_seq2_3,CL26426Contig1,CL1Contig901,CL40541Contig2	2.7451	0.80073	3.42825
ko00904	Diterpenoid biosynthesis	4	255	63	19732	0.0013228	0.0152122	comp58130_c2_seq1_4,CL83252Contig1,CL25005Contig1,comp44288_c0_seq4_3	1.56863	0.319278	4.91304
ko00660	C5-Branched dibasic acid metabolism	3	255	44	19732	0.00246464	0.0261631	CL2120Contig1,CL378Contig4,comp51042_c0_seq1_2	1.17647	0.222988	5.27594
ko00906	Carotenoid biosynthesis	6	255	155	19732	0.00408419	0.0402585	comp54979_c5_seq58_3,CL1Contig1647,comp53517_c1_seq152_1,CL1Contig1157,comp69563_c2_seq8_5,comp74559_c1_seq21_9	2.35294	0.785526	2.99537
ko02020	Two-component system	4	255	91	19732	0.00654148	0.0601816	CL14155Contig1,CL3573Contig1,comp69425_c0_seq32_5,CL53540Contig1	1.56863	0.46118	3.40134
ko00730	Thiamine metabolism	2	255	37	19732	0.0119893	0.103407	comp54996_c2_seq15_7,comp51350_c0_seq16_3	0.784314	0.187513	4.18272
ko00830	Retinol metabolism	3	255	72	19732	0.0141158	0.114587	comp70291_c0_seq7_9,comp46456_c2_seq1_2,CL2313Contig2	1.17647	0.36489	3.22418
ko00980	Metabolism of xenobiotics by cytochrome P450	5	255	156	19732	0.0160133	0.122769	comp70291_c0_seq7_9,comp46456_c2_seq1_2,CL2313Contig2,comp40908_c0_seq1_2,CL1Contig1589	1.96078	0.790594	2.48014
ko00401	Novobiocin biosynthesis	1	255	17	19732	0.0199102	0.144611	CL26426Contig1	0.392157	0.0861545	4.55179
ko00920	Sulfur metabolism	4	255	122	19732	0.021192	0.146225	CL3573Contig1,CL80613Contig1,comp49246_c0_seq6_3,comp66512_c0_seq1_5	1.56863	0.618285	2.53706
Nf vs. N0 down regulated
ID	#Pathway	DEG	DEG_all	Gene	Gene_all	p-value	FDR	GeneID	Cluster_frequency(%)	Genome_frequency(%)	Enrichment_score
ko00944	Flavone and flavonol biosynthesis	4	386	28	19732	0.000189313	0.0295328	CL2351Contig2,CL45502Contig1,CL25650Contig1,CL55399Contig1	1.03627	0.141901	7.30274
ko04150	mTOR signaling pathway	14	386	295	19732	0.00075035	0.0330676	comp55494_c1_seq3_3,CL53036Contig1,CL9086Contig2,CL89Contig8,CL52337Contig1,CL87791Contig1,comp70111_c0_seq62_6,CL55295Contig1,CL89Contig5,CL13887Contig1,CL89Contig6,comp50963_c0_seq1_8,CL6838Contig1,CL41489Contig1	3.62694	1.49503	2.42599
ko04151	PI3K-Akt signaling pathway	22	386	568	19732	0.000865668	0.0330676	comp55494_c1_seq3_3,CL40675Contig1,CL53036Contig1,CL9086Contig2,CL89Contig8,CL52337Contig1,CL87791Contig1,CL46400Contig1,comp70111_c0_seq62_6,CL55295Contig1,CL89Contig5,CL13887Contig1,CL89Contig6,comp50963_c0_seq1_8,CL9071Contig1,CL6838Contig1,CL42632Contig1,CL83914Contig1,CL16134Contig1,CL40675Contig2,CL41489Contig1,CL16509Contig1	5.69948	2.87857	1.97997
ko00480	Glutathione metabolism	14	386	305	19732	0.0010507	0.0330676	CL12688Contig2,CL13411Contig2,CL7907Contig1,CL2278Contig2,CL10177Contig1,CL54191Contig1,CL60139Contig1,comp69277_c0_seq8_6,CL3716Contig3,CL8Contig1,CL55637Contig1,CL1Contig413,CL41824Contig1,CL62567Contig1	3.62694	1.54571	2.34645
ko04068	FoxO signaling pathway	16	386	370	19732	0.00105986	0.0330676	comp55494_c1_seq3_3,CL53036Contig1,CL9086Contig2,CL52268Contig1,CL89Contig8,CL87791Contig1,CL46400Contig1,comp70111_c0_seq62_6,CL55295Contig1,CL46519Contig1,CL89Contig5,CL89Contig6,comp50963_c0_seq1_8,CL6838Contig1,CL1Contig1511,comp45446_c0_seq7_2	4.14508	1.87513	2.21056
ko00910	Nitrogen metabolism	9	386	166	19732	0.00163033	0.0423885	CL10051Contig2,comp54853_c0_seq10_7,comp50972_c0_seq14_3,comp71591_c0_seq12_5,CL18665Contig2,CL1925Contig1,CL4738Contig2,CL4435Contig2,CL52150Contig1	2.33161	0.841273	2.77152
ko00982	Drug metabolism - cytochrome P450	8	386	147	19732	0.00246355	0.0440475	CL12688Contig2,CL7907Contig1,CL10177Contig1,comp69277_c0_seq8_6,CL3716Contig3,CL8Contig1,CL1Contig413,CL41824Contig1	2.07254	0.744983	2.782
ko04152	AMPK signaling pathway	19	386	516	19732	0.00305002	0.0440475	comp55494_c1_seq3_3,CL44453Contig1,CL15471Contig1,CL55298Contig1,CL30720Contig1,CL52268Contig1,CL89Contig8,comp70111_c0_seq62_6,CL55295Contig1,CL89Contig5,CL13887Contig1,CL15471Contig3,CL89Contig6,comp50963_c0_seq1_8,CL9071Contig1,CL6838Contig1,CL41489Contig1,CL16509Contig1,CL32406Contig1	4.92228	2.61504	1.8823
ko04013	MAPK signaling pathway - fly	4	386	51	19732	0.00313365	0.0440475	CL53036Contig1,CL9086Contig2,CL87791Contig1,CL46400Contig1	1.03627	0.258463	4.00935
ko04145	Phagosome	17	386	447	19732	0.0032505	0.0440475	CL59420Contig1,CL13269Contig2,CL60340Contig1,CL61434Contig1,CL59910Contig1,CL54171Contig1,CL17900Contig1,CL38466Contig2,CL34430Contig1,CL56034Contig1,CL35268Contig1,CL35706Contig1,CL55958Contig1,CL83914Contig1,CL16134Contig1,CL162Contig9,CL79007Contig1	4.40415	2.26536	1.94413
ko04012	ErbB signaling pathway	6	386	99	19732	0.0033103	0.0440475	CL53036Contig1,CL9086Contig2,CL87791Contig1,CL46400Contig1,CL13887Contig1,CL41489Contig1	1.5544	0.501723	3.09813
ko00980	Metabolism of xenobiotics by cytochrome P450	8	386	156	19732	0.00366475	0.0440475	CL12688Contig2,CL7907Contig1,CL10177Contig1,comp69277_c0_seq8_6,CL3716Contig3,CL8Contig1,CL1Contig413,CL41824Contig1	2.07254	0.790594	2.6215
ko00943	Isoflavonoid biosynthesis	1	386	5	19732	0.00367062	0.0440475	CL2045Contig1	0.259067	0.0253395	10.2238
ko04350	TGF-beta signaling pathway	8	386	166	19732	0.00549297	0.0612074	CL53036Contig1,CL9086Contig2,CL53545Contig1,CL87791Contig1,CL13887Contig1,CL53592Contig1,CL2734Contig1,CL41489Contig1	2.07254	0.841273	2.46357
ko00905	Brassinosteroid biosynthesis	4	386	63	19732	0.0077541	0.0806426	CL16735Contig1,CL4922Contig4,CL55387Contig1,CL28933Contig1	1.03627	0.319278	3.24566
ko04540	Gap junction	7	386	148	19732	0.00878029	0.0856079	CL13269Contig2,CL53036Contig1,CL9086Contig2,CL17900Contig1,CL87791Contig1,CL46400Contig1,CL55958Contig1	1.81347	0.750051	2.4178
ko03010	Ribosome	47	386	1742	19732	0.00983008	0.0902054	CL56514Contig1,comp73167_c2_seq1_9,CL54235Contig1,CL54359Contig1,CL62707Contig1,CL66156Contig1,CL39361Contig1,CL77036Contig1,CL55606Contig1,CL54973Contig1,CL41731Contig1,CL49597Contig1,CL52337Contig1,CL54140Contig1,CL63779Contig1,CL56549Contig1,CL53831Contig1,CL52157Contig1,CL52787Contig1,CL54922Contig1,comp74625_c0_seq3_5,CL54210Contig1,CL56330Contig1,CL52676Contig1,CL54870Contig1,CL54605Contig1…	12.1762	8.8283	1.37922
ko04550	Signaling pathways regulating pluripotency of stem cells	4	386	71	19732	0.0126633	0.107413	CL53036Contig1,CL9086Contig2,CL87791Contig1,CL46400Contig1	1.03627	0.359822	2.87995
ko04140	Regulation of autophagy	9	386	224	19732	0.0130823	0.107413	comp55494_c1_seq3_3,CL89Contig8,comp70111_c0_seq62_6,CL55295Contig1,CL46519Contig1,CL89Contig5,CL89Contig6,comp50963_c0_seq1_8,CL6838Contig1	2.33161	1.13521	2.0539
ko04210	Apoptosis	8	386	195	19732	0.0148565	0.108009	CL13269Contig2,CL53036Contig1,CL9086Contig2,CL60340Contig1,CL87791Contig1,CL46400Contig1,CL55958Contig1,CL79007Contig1	2.07254	0.988242	2.0972
Nf vs. Nl up/down regulated
ID	#Pathway	DEG	DEG_all	Gene	Gene_all	p-value	FDR	GeneID	Cluster_frequency(%)	Genome_frequency(%)	Enrichment_score
ko00940	Phenylpropanoid biosynthesis	30	421	383	19732	2.33865e-10	3.44519e-08	comp68852_c0_seq4_9,CL16264Contig1,CL26316Contig1,CL316Contig2,CL16091Contig1,comp50646_c0_seq2_7,CL317Contig8,CL28551Contig1,CL25887Contig1,comp65024_c0_seq1_5,comp54422_c1_seq2_3,CL1575Contig3,CL13039Contig1,CL1Contig486,CL2211Contig5,CL1116Contig4,CL3516Contig2,CL93Contig2,CL2259Contig2,CL12607Contig1,CL1Contig1216,CL1176Contig2,CL2219Contig4,CL16153Contig1,CL767Contig3,CL1Contig901,CL10770Con…	7.12589	1.94101	3.67123
ko00910	Nitrogen metabolism	19	421	166	19732	4.41691e-10	3.44519e-08	CL11423Contig2,CL14155Contig1,comp50972_c0_seq14_3,CL18665Contig1,CL4239Contig3,CL38371Contig1,CL1925Contig1,comp48626_c4_seq23_1,comp58326_c2_seq4_4,CL9950Contig1,CL4239Contig2,CL1265Contig4,CL1Contig1798,CL66987Contig1,comp59435_c0_seq1_7,CL4239Contig1,comp43382_c0_seq1_1,CL1Contig133,CL6149Contig2	4.51306	0.841273	5.36457
ko00360	Phenylalanine metabolism	15	421	158	19732	2.87237e-07	1.49363e-05	CL7426Contig1,comp68852_c0_seq4_9,comp74989_c0_seq2_9,comp61039_c0_seq2_5,comp50646_c0_seq2_7,CL317Contig8,CL1085Contig4,comp54422_c1_seq2_3,CL26426Contig1,CL1575Contig3,CL1Contig486,CL1Contig1216,CL1Contig901,CL40541Contig2,CL71Contig2	3.56295	0.80073	4.44962
ko00471	D-Glutamine and D-glutamate metabolism	5	421	15	19732	3.87106e-07	1.50971e-05	CL4239Contig3,CL4239Contig2,CL1265Contig4,CL4239Contig1,comp43382_c0_seq1_1	1.18765	0.0760186	15.6231
ko00941	Flavonoid biosynthesis	11	421	125	19732	1.52647e-05	0.000476259	CL2351Contig2,CL316Contig2,CL317Contig8,CL59060Contig1,comp54422_c1_seq2_3,CL1575Contig3,CL13039Contig1,CL12607Contig1,CL767Contig3,CL1Contig901,CL40541Contig2	2.61283	0.633489	4.1245
ko00130	Ubiquinone and other terpenoid-quinone biosynthesis	10	421	127	19732	8.87074e-05	0.00230639	comp74989_c0_seq2_9,comp70284_c0_seq8_6,CL11180Contig1,CL1085Contig4,CL108Contig4,CL26426Contig1,CL1575Contig3,CL1Contig486,CL10127Contig1,CL13019Contig1	2.3753	0.643625	3.6905
ko00904	Diterpenoid biosynthesis	6	421	63	19732	0.000378439	0.00676733	comp71229_c1_seq2_9,CL1Contig773,CL18157Contig3,CL83252Contig1,CL25005Contig1,CL2749Contig1	1.42518	0.319278	4.46375
ko00950	Isoquinoline alkaloid biosynthesis	8	421	104	19732	0.00038682	0.00676733	CL1148Contig2,CL7426Contig1,comp61039_c0_seq2_5,comp53464_c0_seq8_7,CL6019Contig1,CL1085Contig4,CL26426Contig1,CL250Contig6	1.90024	0.527063	3.60534
ko00500	Starch and sucrose metabolism	29	421	719	19732	0.000390423	0.00676733	comp52234_c2_seq2_2,comp65287_c0_seq171_6,comp47888_c0_seq11_1,CL58998Contig1,CL3233Contig2,CL9715Contig2,CL15Contig21,comp43101_c0_seq7_3,comp48352_c0_seq4_7,CL16Contig31,CL40503Contig1,CL1Contig467,CL43126Contig1,CL16981Contig1,CL1670Contig1,CL28551Contig1,comp26590_c0_seq1_2,CL13460Contig1,CL27877Contig1,CL7198Contig1,CL6894Contig1,CL1254Contig2,CL35729Contig1,comp41796_c0_seq2_3,CL3897Contig1…	6.88836	3.64383	1.89042
ko00945	Stilbenoid, diarylheptanoid and gingerol biosynthesis	9	421	129	19732	0.000452409	0.00705758	CL316Contig2,CL317Contig8,comp54422_c1_seq2_3,CL1575Contig3,CL13039Contig1,CL12607Contig1,CL767Contig3,CL1Contig901,CL40541Contig2	2.13777	0.65376	3.26996
ko01053	Biosynthesis of siderophore group nonribosomal peptides	1	421	3	19732	0.0013432	0.019049	CL11180Contig1	0.23753	0.0152037	15.6231
ko00250	Alanine, aspartate and glutamate metabolism	13	421	264	19732	0.00169251	0.0219477	CL62Contig6,CL14155Contig1,CL4239Contig3,comp48495_c0_seq2_3,comp63115_c0_seq6_8,CL24909Contig1,CL36809Contig1,CL13992Contig1,CL4239Contig2,CL1265Contig4,comp59435_c0_seq1_7,CL4239Contig1,comp43382_c0_seq1_1	3.08789	1.33793	2.30796
ko01230	Biosynthesis of amino acids	33	421	936	19732	0.00182897	0.0219477	comp41915_c0_seq4_2,comp38777_c0_seq1_7,CL52620Contig1,comp68115_c0_seq18_6,comp49536_c1_seq7_2,CL14155Contig1,comp70879_c0_seq4_5,CL41961Contig1,CL22588Contig1,CL33855Contig1,CL1719Contig5,CL4787Contig1,CL9036Contig2,comp35237_c0_seq1_3,CL60611Contig1,CL24909Contig1,CL9639Contig1,CL36809Contig1,CL80483Contig1,CL9036Contig1,CL1085Contig4,comp37792_c0_seq1_1,comp45456_c0_seq1_3,comp71546_c1_seq1_9…	7.83848	4.74356	1.65245
ko00052	Galactose metabolism	13	421	286	19732	0.0035071	0.0390792	comp52234_c2_seq2_2,comp68115_c0_seq18_6,comp70879_c0_seq4_5,CL16Contig31,comp43834_c0_seq3_1,CL38Contig15,CL7198Contig1,comp38180_c0_seq1_7,CL1Contig235,CL414Contig1,CL38Contig13,CL414Contig6,CL2566Contig1	3.08789	1.44942	2.13043
ko00943	Isoflavonoid biosynthesis	1	421	5	19732	0.00435177	0.0452584	CL2045Contig1	0.23753	0.0253395	9.37387
ko00290	Valine, leucine and isoleucine biosynthesis	6	421	97	19732	0.00474233	0.0454925	comp41915_c0_seq4_2,CL41961Contig1,CL4787Contig1,CL9639Contig1,comp45456_c0_seq1_3,CL14240Contig2	1.42518	0.491587	2.89914
ko04115	p53 signaling pathway	9	421	179	19732	0.00520366	0.0454925	CL81372Contig1,CL9144Contig1,comp50491_c1_seq30_7,CL1918Contig3,comp49188_c0_seq30_3,CL3573Contig1,comp64762_c0_seq33_6,CL2049Contig3,CL3342Contig4	2.13777	0.907156	2.35656
ko00401	Novobiocin biosynthesis	2	421	17	19732	0.00524913	0.0454925	CL1085Contig4,CL26426Contig1	0.475059	0.0861545	5.51404
ko00051	Fructose and mannose metabolism	11	421	246	19732	0.00680267	0.0558535	comp68115_c0_seq18_6,CL58998Contig1,comp70879_c0_seq4_5,CL40503Contig1,CL1Contig455,CL80483Contig1,comp46650_c0_seq2_7,comp26590_c0_seq1_2,comp44925_c0_seq1_7,CL2656Contig1,comp73352_c1_seq1_5	2.61283	1.24671	2.09578
ko00350	Tyrosine metabolism	8	421	170	19732	0.0109337	0.0840307	CL7426Contig1,comp67146_c0_seq6_9,comp74989_c0_seq2_9,comp61039_c0_seq2_5,CL6019Contig1,CL1085Contig4,CL26426Contig1,CL250Contig6	1.90024	0.861545	2.20562
Nf vs. Nl up regulated
ID	#Pathway	DEG	DEG_all	Gene	Gene_all	p-value	FDR	GeneID	Cluster_frequency(%)	Genome_frequency(%)	Enrichment_score
ko00940	Phenylpropanoid biosynthesis	26	218	383	19732	1.93914e-14	2.54027e-12	comp68852_c0_seq4_9,CL16264Contig1,CL26316Contig1,CL316Contig2,CL16091Contig1,comp50646_c0_seq2_7,CL317Contig8,CL25887Contig1,comp65024_c0_seq1_5,comp54422_c1_seq2_3,CL1575Contig3,CL13039Contig1,CL1Contig486,CL2211Contig5,CL93Contig2,CL2259Contig2,CL12607Contig1,CL1Contig1216,CL1176Contig2,CL2219Contig4,CL16153Contig1,CL767Contig3,CL1Contig901,CL10770Contig1,CL40541Contig2,CL71Contig2	11.9266	1.94101	6.14454
ko00360	Phenylalanine metabolism	13	218	158	19732	2.50722e-09	1.64223e-07	CL7426Contig1,comp68852_c0_seq4_9,comp50646_c0_seq2_7,CL317Contig8,CL1085Contig4,comp54422_c1_seq2_3,CL26426Contig1,CL1575Contig3,CL1Contig486,CL1Contig1216,CL1Contig901,CL40541Contig2,CL71Contig2	5.9633	0.80073	7.44733
ko00910	Nitrogen metabolism	13	218	166	19732	4.77051e-09	2.08312e-07	CL11423Contig2,CL14155Contig1,CL18665Contig1,CL38371Contig1,comp48626_c4_seq23_1,comp58326_c2_seq4_4,CL4239Contig2,CL1265Contig4,CL66987Contig1,comp59435_c0_seq1_7,comp43382_c0_seq1_1,CL1Contig133,CL6149Contig2	5.9633	0.841273	7.08843
ko00941	Flavonoid biosynthesis	10	218	125	19732	1.43273e-07	4.69218e-06	CL316Contig2,CL317Contig8,CL59060Contig1,comp54422_c1_seq2_3,CL1575Contig3,CL13039Contig1,CL12607Contig1,CL767Contig3,CL1Contig901,CL40541Contig2	4.58716	0.633489	7.2411
ko00945	Stilbenoid, diarylheptanoid and gingerol biosynthesis	9	218	129	19732	1.72545e-06	4.52068e-05	CL316Contig2,CL317Contig8,comp54422_c1_seq2_3,CL1575Contig3,CL13039Contig1,CL12607Contig1,CL767Contig3,CL1Contig901,CL40541Contig2	4.12844	0.65376	6.31491
ko00904	Diterpenoid biosynthesis	6	218	63	19732	5.97207e-06	0.00013039	comp71229_c1_seq2_9,CL1Contig773,CL18157Contig3,CL83252Contig1,CL25005Contig1,CL2749Contig1	2.75229	0.319278	8.62036
ko00130	Ubiquinone and other terpenoid-quinone biosynthesis	8	218	127	19732	1.19341e-05	0.000223338	comp70284_c0_seq8_6,CL11180Contig1,CL1085Contig4,CL108Contig4,CL26426Contig1,CL1575Contig3,CL1Contig486,CL13019Contig1	3.66972	0.643625	5.70165
ko00471	D-Glutamine and D-glutamate metabolism	3	218	15	19732	1.79812e-05	0.000294442	CL4239Contig2,CL1265Contig4,comp43382_c0_seq1_1	1.37615	0.0760186	18.1028
ko01053	Biosynthesis of siderophore group nonribosomal peptides	1	218	3	19732	0.000361856	0.00523854	CL11180Contig1	0.458716	0.0152037	30.1713
ko00900	Terpenoid backbone biosynthesis	9	218	244	19732	0.000399888	0.00523854	CL4842Contig1,CL870Contig2,comp47624_c0_seq1_4,CL540Contig1,CL8090Contig1,comp64888_c0_seq8_5,comp54258_c0_seq3_4,comp57112_c1_seq1_6,CL589Contig4	4.12844	1.23657	3.33862
ko00401	Novobiocin biosynthesis	2	218	17	19732	0.000806678	0.0096068	CL1085Contig4,CL26426Contig1	0.917431	0.0861545	10.6487
ko02020	Two-component system	4	218	91	19732	0.00338712	0.0369761	CL14155Contig1,CL3573Contig1,comp59435_c0_seq1_7,CL53540Contig1	1.83486	0.46118	3.97863
ko00400	Phenylalanine, tyrosine and tryptophan biosynthesis	5	218	142	19732	0.00500503	0.0504353	comp49536_c1_seq7_2,CL1085Contig4,comp37792_c0_seq1_1,CL26426Contig1,CL299Contig4	2.29358	0.719643	3.1871
ko00950	Isoquinoline alkaloid biosynthesis	4	218	104	19732	0.00597111	0.0558725	CL7426Contig1,CL1085Contig4,CL26426Contig1,CL250Contig6	1.83486	0.527063	3.4813
ko00791	Atrazine degradation	1	218	12	19732	0.00745511	0.0622074	comp44721_c0_seq13_2	0.458716	0.0608149	7.54281
ko00906	Carotenoid biosynthesis	5	218	155	19732	0.00759785	0.0622074	CL64Contig21,comp56109_c2_seq2_7,comp69563_c2_seq8_5,CL37410Contig1,comp74559_c1_seq21_9	2.29358	0.785526	2.9198
ko00830	Retinol metabolism	3	218	72	19732	0.00830092	0.0633729	CL3782Contig2,comp72281_c0_seq2_9,comp71153_c1_seq3_5	1.37615	0.36489	3.77141
ko00960	Tropane, piperidine and pyridine alkaloid biosynthesis	3	218	73	19732	0.00870772	0.0633729	CL7426Contig1,CL1085Contig4,CL26426Contig1	1.37615	0.369957	3.71974
ko00250	Alanine, aspartate and glutamate metabolism	7	218	264	19732	0.00926308	0.0638665	CL62Contig6,CL14155Contig1,comp48495_c0_seq2_3,CL4239Contig2,CL1265Contig4,comp59435_c0_seq1_7,comp43382_c0_seq1_1	3.21101	1.33793	2.39999
ko04390	Hippo signaling pathway	5	218	170	19732	0.0116577	0.0763581	CL17614Contig1,comp48247_c0_seq2_7,CL11283Contig1,CL1720Contig1,CL1354Contig1	2.29358	0.861545	2.66217
Nf vs. Nl down regulated
ID	#Pathway	DEG	DEG_all	Gene	Gene_all	p-value	FDR	GeneID	Cluster_frequency(%)	Genome_frequency(%)	Enrichment_score
ko00500	Starch and sucrose metabolism	19	203	719	19732	5.56149e-05	0.00728555	comp52234_c2_seq2_2,comp47888_c0_seq11_1,CL58998Contig1,CL3233Contig2,CL15Contig21,comp43101_c0_seq7_3,comp48352_c0_seq4_7,CL16Contig31,CL43126Contig1,CL1670Contig1,CL28551Contig1,CL13460Contig1,CL7198Contig1,CL6894Contig1,CL35729Contig1,CL3897Contig1,comp49799_c0_seq9_7,comp57568_c0_seq1_9,CL134Contig3	9.35961	3.64383	2.56862
ko00471	D-Glutamine and D-glutamate metabolism	2	203	15	19732	0.000445591	0.0218451	CL4239Contig3,CL4239Contig1	0.985222	0.0760186	12.9603
ko00290	Valine, leucine and isoleucine biosynthesis	5	203	97	19732	0.00050027	0.0218451	comp41915_c0_seq4_2,CL4787Contig1,CL9639Contig1,comp45456_c0_seq1_3,CL14240Contig2	2.46305	0.491587	5.01041
ko01230	Biosynthesis of amino acids	20	203	936	19732	0.000678614	0.0222246	comp41915_c0_seq4_2,CL52620Contig1,comp68115_c0_seq18_6,CL22588Contig1,CL33855Contig1,CL4787Contig1,CL9036Contig2,comp35237_c0_seq1_3,CL60611Contig1,CL24909Contig1,CL9639Contig1,CL36809Contig1,CL80483Contig1,CL9036Contig1,comp45456_c0_seq1_3,comp71546_c1_seq1_9,CL2656Contig1,CL14240Contig2,CL630Contig6,comp42040_c0_seq1_6	9.85222	4.74356	2.07697
ko00943	Isoflavonoid biosynthesis	1	203	5	19732	0.00103194	0.0270369	CL2045Contig1	0.492611	0.0253395	19.4404
ko00910	Nitrogen metabolism	6	203	166	19732	0.00168313	0.0367483	comp50972_c0_seq14_3,CL4239Contig3,CL1925Contig1,CL9950Contig1,CL1Contig1798,CL4239Contig1	2.95567	0.841273	3.51332
ko00051	Fructose and mannose metabolism	7	203	246	19732	0.00404593	0.0648473	comp68115_c0_seq18_6,CL58998Contig1,CL1Contig455,CL80483Contig1,comp46650_c0_seq2_7,comp44925_c0_seq1_7,CL2656Contig1	3.44828	1.24671	2.76591
ko00950	Isoquinoline alkaloid biosynthesis	4	203	104	19732	0.00443154	0.0648473	CL1148Contig2,comp61039_c0_seq2_5,comp53464_c0_seq8_7,CL6019Contig1	1.97044	0.527063	3.73854
ko01210	2-Oxocarboxylic acid metabolism	7	203	250	19732	0.00445515	0.0648473	comp41915_c0_seq4_2,CL4787Contig1,CL24909Contig1,CL9639Contig1,CL36809Contig1,comp45456_c0_seq1_3,CL14240Contig2	3.44828	1.26698	2.72166
ko00770	Pantothenate and CoA biosynthesis	4	203	117	19732	0.00725739	0.0873923	comp41915_c0_seq4_2,CL4787Contig1,comp45456_c0_seq1_3,CL14240Contig2	1.97044	0.592945	3.32314
ko04152	AMPK signaling pathway	11	203	516	19732	0.00733829	0.0873923	comp68115_c0_seq18_6,CL15471Contig1,CL89Contig8,CL1666Contig1,CL30505Contig1,CL3343Contig2,comp67043_c0_seq31_5,CL15471Contig2,CL15471Contig3,comp50963_c0_seq1_8,CL16509Contig1	5.41872	2.61504	2.07214
ko00270	Cysteine and methionine metabolism	9	203	399	19732	0.00852225	0.0930346	comp41915_c0_seq4_2,comp35237_c0_seq1_3,CL2363Contig4,CL5455Contig2,comp45456_c0_seq1_3,comp56533_c0_seq1_8,CL16706Contig1,CL14240Contig2,CL630Contig6	4.4335	2.0221	2.19253
ko00052	Galactose metabolism	7	203	286	19732	0.00972373	0.094749	comp52234_c2_seq2_2,comp68115_c0_seq18_6,CL16Contig31,CL7198Contig1,comp38180_c0_seq1_7,CL414Contig1,CL414Contig6	3.44828	1.44942	2.37907
ko00232	Caffeine metabolism	1	203	15	19732	0.0101258	0.094749	CL10569Contig1	0.492611	0.0760186	6.48013
ko04068	FoxO signaling pathway	8	203	370	19732	0.0146896	0.128289	CL9086Contig2,CL89Contig8,CL1Contig488,CL3343Contig2,comp67043_c0_seq31_5,comp50963_c0_seq1_8,CL1Contig1511,comp45446_c0_seq7_2	3.94089	1.87513	2.10166
ko00250	Alanine, aspartate and glutamate metabolism	6	203	264	19732	0.0197365	0.161593	CL4239Contig3,comp63115_c0_seq6_8,CL24909Contig1,CL36809Contig1,CL13992Contig1,CL4239Contig1	2.95567	1.33793	2.20914
ko01040	Biosynthesis of unsaturated fatty acids	4	203	157	19732	0.0233098	0.179623	CL1Contig520,CL1666Contig1,CL37625Contig1,comp53858_c1_seq2_1	1.97044	0.795662	2.47648
ko00680	Methane metabolism	5	203	219	19732	0.0260357	0.186916	comp68115_c0_seq18_6,CL33855Contig1,CL15912Contig1,CL60611Contig1,CL80483Contig1	2.46305	1.10987	2.21922
ko04140	Regulation of autophagy	5	203	224	19732	0.0286487	0.186916	CL89Contig8,comp67043_c0_seq31_5,comp50963_c0_seq1_8,CL12785Contig3,CL256Contig2	2.46305	1.13521	2.16969
ko00140	Steroid hormone biosynthesis	1	203	26	19732	0.0291109	0.186916	CL14600Contig1	0.492611	0.131766	3.73854
Nl vs. N0 up/down regulated
ID	#Pathway	DEG	DEG_all	Gene	Gene_all	p-value	FDR	GeneID	Cluster_frequency(%)	Genome_frequency(%)	Enrichment_score
ko03010	Ribosome	115	614	1742	19732	1.86168e-15	3.12762e-13	CL59882Contig1,CL56514Contig1,CL22158Contig1,CL58424Contig1,CL77868Contig1,CL64877Contig1,CL29650Contig1,CL65371Contig1,CL52497Contig1,CL60821Contig1,CL38819Contig1,CL78577Contig1,CL54235Contig1,CL41682Contig1,CL54076Contig1,CL54359Contig1,CL36942Contig1,CL66448Contig1,CL52457Contig1,CL52430Contig1,CL82893Contig1,comp47239_c0_seq1_6,CL52424Contig1,CL62707Contig1,CL77226Contig1,CL58788Contig1,CL53…	18.7296	8.8283	2.12155
ko00910	Nitrogen metabolism	18	614	166	19732	1.06723e-06	8.96476e-05	CL10051Contig2,comp66490_c0_seq1_5,CL4239Contig3,CL43632Contig1,comp15522_c0_seq1_2,CL38371Contig1,comp40204_c0_seq2_3,comp48626_c4_seq23_1,CL9950Contig1,comp41788_c0_seq2_1,CL18154Contig1,CL39350Contig1,CL1Contig1798,CL66987Contig1,comp59435_c0_seq1_7,CL4239Contig1,CL6149Contig2,CL52150Contig1	2.9316	0.841273	3.48471
ko00944	Flavone and flavonol biosynthesis	6	614	28	19732	1.82807e-05	0.00102372	CL2351Contig2,CL45502Contig1,CL25650Contig1,CL59060Contig1,CL13818Contig1,CL55399Contig1	0.977199	0.141901	6.88646
ko00471	D-Glutamine and D-glutamate metabolism	4	614	15	19732	6.6505e-05	0.00250825	CL4239Contig3,comp40204_c0_seq2_3,comp41788_c0_seq2_1,CL4239Contig1	0.651466	0.0760186	8.56982
ko00830	Retinol metabolism	9	614	72	19732	7.46504e-05	0.00250825	CL54701Contig1,CL10603Contig2,CL32614Contig1,CL12341Contig1,CL14600Contig1,CL3782Contig2,CL47548Contig1,CL10603Contig1,CL2362Contig1	1.4658	0.36489	4.0171
ko01220	Degradation of aromatic compounds	5	614	28	19732	0.00018594	0.00520632	CL10603Contig2,CL1575Contig3,CL29151Contig1,CL10603Contig1,CL2362Contig1	0.814332	0.141901	5.73872
ko04152	AMPK signaling pathway	30	614	516	19732	0.000396138	0.0095073	CL61156Contig1,CL52351Contig1,comp68115_c0_seq18_6,CL55298Contig1,CL30720Contig1,CL52268Contig1,CL42122Contig1,CL54Contig14,CL14791Contig1,CL28460Contig1,CL55295Contig1,CL15867Contig1,CL52945Contig1,CL6867Contig1,CL13887Contig1,CL53285Contig1,CL29421Contig1,CL12782Contig2,CL89Contig6,CL44648Contig1,CL46960Contig1,CL8497Contig1,CL6838Contig1,CL28575Contig1,CL6867Contig2,CL45162Contig1,CL44546Conti…	4.88599	2.61504	1.86842
ko00941	Flavonoid biosynthesis	10	614	125	19732	0.00182391	0.0383021	CL2351Contig2,CL45502Contig1,CL25650Contig1,CL59060Contig1,CL13818Contig1,CL55399Contig1,CL1575Contig3,CL42594Contig1,CL13039Contig1,CL29151Contig1	1.62866	0.633489	2.57094
ko01053	Biosynthesis of siderophore group nonribosomal peptides	1	614	3	19732	0.00284024	0.0530178	CL11180Contig1	0.162866	0.0152037	10.7123
ko00360	Phenylalanine metabolism	11	614	158	19732	0.00395638	0.0663682	comp68852_c0_seq4_9,comp61039_c0_seq2_5,CL1Contig358,CL6613Contig2,CL1575Contig3,CL42594Contig1,CL29151Contig1,CL65646Contig1,CL4053Contig3,CL1Contig1216,CL71Contig2	1.79153	0.80073	2.23737
ko00626	Naphthalene degradation	3	614	22	19732	0.00434554	0.0663682	CL10603Contig2,CL10603Contig1,CL2362Contig1	0.488599	0.111494	4.38229
ko00361	Chlorocyclohexane and chlorobenzene degradation	1	614	4	19732	0.00556332	0.0667598	CL47100Contig1	0.162866	0.0202716	8.0342
ko00364	Fluorobenzoate degradation	1	614	4	19732	0.00556332	0.0667598	CL47100Contig1	0.162866	0.0202716	8.0342
ko00623	Toluene degradation	1	614	4	19732	0.00556332	0.0667598	CL47100Contig1	0.162866	0.0202716	8.0342
ko04151	PI3K-Akt signaling pathway	28	614	568	19732	0.00652127	0.0730382	CL51531Contig1,CL61156Contig1,CL40675Contig1,comp48247_c0_seq2_7,CL83116Contig1,CL63Contig7,CL37840Contig1,CL20215Contig2,CL52337Contig1,CL87791Contig1,CL28460Contig1,CL55295Contig1,CL55504Contig1,CL6867Contig1,CL13887Contig1,CL88394Contig1,CL12782Contig2,CL89Contig6,CL8497Contig1,CL6838Contig1,CL42632Contig1,CL6867Contig2,CL2Contig1,CL83914Contig1,CL16134Contig1,CL44546Contig1,CL40675Contig2,com…	4.56026	2.87857	1.58421
ko04145	Phagosome	23	614	447	19732	0.00706658	0.0741991	comp65684_c0_seq3_5,CL13269Contig2,comp56600_c1_seq12_4,CL61434Contig1,CL59910Contig1,CL54171Contig1,CL20215Contig2,CL38466Contig2,CL40445Contig1,CL42476Contig1,CL88394Contig1,CL28272Contig1,CL35706Contig1,CL55958Contig1,CL65453Contig1,CL83914Contig1,CL16134Contig1,CL53969Contig1,CL33639Contig1,CL38950Contig1,comp41567_c0_seq2_2,CL41726Contig1,CL3332Contig3	3.74593	2.26536	1.65357
ko00943	Isoflavonoid biosynthesis	1	614	5	19732	0.00908145	0.0859285	CL63016Contig1	0.162866	0.0253395	6.42736
ko00190	Oxidative phosphorylation	28	614	584	19732	0.00938632	0.0859285	CL64Contig12,CL83156Contig1,CL53241Contig1,CL76892Contig1,comp67612_c0_seq17_9,CL61434Contig1,CL54171Contig1,CL58079Contig1,CL35812Contig1,CL15718Contig1,CL27377Contig1,CL65237Contig1,CL38864Contig1,CL13369Contig1,CL30642Contig1,CL40445Contig1,CL81843Contig1,CL52819Contig1,CL42476Contig1,CL38404Contig1,CL81330Contig1,CL65453Contig1,CL53969Contig1,CL64Contig9,CL33639Contig1,CL38950Contig1,CL18107C…	4.56026	2.95966	1.54081
ko00980	Metabolism of xenobiotics by cytochrome P450	10	614	156	19732	0.00971811	0.0859285	CL10603Contig2,CL81399Contig1,CL83554Contig1,CL14600Contig1,CL8Contig1,CL38475Contig1,CL10603Contig1,CL2362Contig1,CL41824Contig1,CL35857Contig1	1.62866	0.790594	2.06005
ko04015	Rap1 signaling pathway	11	614	184	19732	0.0127435	0.107045	CL51531Contig1,CL37784Contig1,CL20215Contig2,CL35166Contig2,CL54240Contig1,CL87791Contig1,CL88394Contig1,CL78478Contig1,CL2Contig1,CL83914Contig1,CL16134Contig1	1.79153	0.932495	1.92122
Nl vs. N0 up regulated
ID	#Pathway	DEG	DEG_all	Gene	Gene_all	p-value	FDR	GeneID	Cluster_frequency(%)	Genome_frequency(%)	Enrichment_score
ko00471	D-Glutamine and D-glutamate metabolism	4	113	15	19732	1.61625e-08	1.69706e-06	CL4239Contig3,comp40204_c0_seq2_3,comp41788_c0_seq2_1,CL4239Contig1	3.53982	0.0760186	46.5652
ko00910	Nitrogen metabolism	9	113	166	19732	3.98818e-08	2.09379e-06	CL4239Contig3,comp15522_c0_seq1_2,CL38371Contig1,comp40204_c0_seq2_3,CL9950Contig1,comp41788_c0_seq2_1,CL1Contig1798,CL4239Contig1,CL6149Contig2	7.9646	0.841273	9.46732
ko00052	Galactose metabolism	9	113	286	19732	5.83604e-06	0.000204261	comp68115_c0_seq18_6,comp65896_c2_seq1_9,CL82363Contig1,CL7198Contig1,comp38180_c0_seq1_7,CL414Contig1,comp54978_c0_seq1_7,comp46229_c2_seq4_3,CL414Contig6	7.9646	1.44942	5.49502
ko00943	Isoflavonoid biosynthesis	1	113	5	19732	0.000321427	0.00843746	CL63016Contig1	0.884956	0.0253395	34.9239
ko00030	Pentose phosphate pathway	5	113	206	19732	0.00120441	0.0252925	comp68115_c0_seq18_6,CL54Contig14,CL7198Contig1,CL9946Contig1,comp54978_c0_seq1_7	4.42478	1.04399	4.23834
ko00270	Cysteine and methionine metabolism	7	113	399	19732	0.0021057	0.0335617	CL2363Contig3,comp43981_c0_seq1_3,CL2363Contig4,CL5455Contig2,comp45456_c0_seq1_3,comp56533_c0_seq1_8,CL14240Contig2	6.19469	2.0221	3.0635
ko00290	Valine, leucine and isoleucine biosynthesis	3	113	97	19732	0.00234668	0.0335617	CL9639Contig1,comp45456_c0_seq1_3,CL14240Contig2	2.65487	0.491587	5.4006
ko00500	Starch and sucrose metabolism	10	113	719	19732	0.00278537	0.0335617	CL15Contig21,CL43126Contig1,CL28551Contig1,CL13460Contig1,CL7198Contig1,comp58669_c0_seq1_6,CL26287Contig1,CL3897Contig1,comp54978_c0_seq1_7,CL25678Contig1	8.84956	3.64383	2.42864
ko00010	Glycolysis / Gluconeogenesis	8	113	516	19732	0.00287671	0.0335617	comp68115_c0_seq18_6,CL561Contig8,CL54Contig14,CL60611Contig1,CL28878Contig1,CL7198Contig1,CL9946Contig1,comp54978_c0_seq1_7	7.07965	2.61504	2.70728
ko00521	Streptomycin biosynthesis	2	113	52	19732	0.00329545	0.0346022	CL7198Contig1,comp54978_c0_seq1_7	1.76991	0.263531	6.71613
ko00960	Tropane, piperidine and pyridine alkaloid biosynthesis	2	113	73	19732	0.00850411	0.0731709	comp61039_c0_seq2_5,CL6613Contig2	1.76991	0.369957	4.7841
ko00680	Methane metabolism	4	113	219	19732	0.00857738	0.0731709	comp68115_c0_seq18_6,CL54Contig14,CL60611Contig1,CL9946Contig1	3.53982	1.10987	3.1894
ko00140	Steroid hormone biosynthesis	1	113	26	19732	0.00965806	0.0731709	CL14600Contig1	0.884956	0.131766	6.71613
ko00531	Glycosaminoglycan degradation	2	113	77	19732	0.00983857	0.0731709	CL1077Contig3,CL82363Contig1	1.76991	0.390229	4.53557
ko04310	Wnt signaling pathway	5	113	322	19732	0.0106071	0.0731709	comp55191_c1_seq1_7,CL13734Contig2,CL10619Contig3,comp56730_c0_seq3_4,CL41063Contig1	4.42478	1.63187	2.71148
ko00944	Flavone and flavonol biosynthesis	1	113	28	19732	0.0111499	0.0731709	CL2351Contig2	0.884956	0.141901	6.23641
ko00360	Phenylalanine metabolism	3	113	158	19732	0.0129861	0.0802082	comp61039_c0_seq2_5,CL1Contig358,CL6613Contig2	2.65487	0.80073	3.31556
ko00450	Selenocompound metabolism	2	113	91	19732	0.015427	0.0899906	CL2363Contig3,CL2363Contig4	1.76991	0.46118	3.83779
ko00250	Alanine, aspartate and glutamate metabolism	4	113	264	19732	0.0180075	0.095974	CL4239Contig3,comp40204_c0_seq2_3,comp41788_c0_seq2_1,CL4239Contig1	3.53982	1.33793	2.64575
ko00190	Oxidative phosphorylation	7	113	584	19732	0.0191049	0.095974	CL64Contig12,comp67612_c0_seq17_9,CL15718Contig1,CL27377Contig1,CL38404Contig1,CL64Contig9,CL18107Contig1	6.19469	2.95966	2.09304
Nl vs. N0 down regulated
ID	#Pathway	DEG	DEG_all	Gene	Gene_all	p-value	FDR	GeneID	Cluster_frequency(%)	Genome_frequency(%)	Enrichment_score
ko03010	Ribosome	112	501	1742	19732	3.96896e-21	6.19157e-19	CL59882Contig1,CL56514Contig1,CL22158Contig1,CL58424Contig1,CL77868Contig1,CL64877Contig1,CL29650Contig1,CL65371Contig1,CL52497Contig1,CL38819Contig1,CL78577Contig1,CL54235Contig1,CL41682Contig1,CL54076Contig1,CL54359Contig1,CL36942Contig1,CL66448Contig1,CL52457Contig1,CL52430Contig1,CL82893Contig1,comp47239_c0_seq1_6,CL52424Contig1,CL62707Contig1,CL77226Contig1,CL58788Contig1,CL53680Contig1,comp…	22.3553	8.8283	2.53223
ko00944	Flavone and flavonol biosynthesis	5	501	28	19732	6.08854e-05	0.00316604	CL45502Contig1,CL25650Contig1,CL59060Contig1,CL13818Contig1,CL55399Contig1	0.998004	0.141901	7.03308
ko01220	Degradation of aromatic compounds	5	501	28	19732	6.08854e-05	0.00316604	CL10603Contig2,CL1575Contig3,CL29151Contig1,CL10603Contig1,CL2362Contig1	0.998004	0.141901	7.03308
ko00830	Retinol metabolism	8	501	72	19732	8.39674e-05	0.00327473	CL54701Contig1,CL10603Contig2,CL32614Contig1,CL12341Contig1,CL3782Contig2,CL47548Contig1,CL10603Contig1,CL2362Contig1	1.59681	0.36489	4.37614
ko04152	AMPK signaling pathway	27	501	516	19732	0.000147362	0.00459768	CL61156Contig1,CL52351Contig1,CL55298Contig1,CL30720Contig1,CL52268Contig1,CL42122Contig1,CL14791Contig1,CL55295Contig1,CL15867Contig1,CL52945Contig1,CL6867Contig1,CL13887Contig1,CL53285Contig1,CL29421Contig1,CL12782Contig2,CL89Contig6,CL44648Contig1,CL46960Contig1,CL8497Contig1,CL6838Contig1,CL28575Contig1,CL6867Contig2,CL45162Contig1,CL44546Contig1,CL37921Contig1,CL32406Contig1,comp66374_c0_seq…	5.38922	2.61504	2.06086
ko04151	PI3K-Akt signaling pathway	27	501	568	19732	0.000685466	0.0178221	CL51531Contig1,CL61156Contig1,CL40675Contig1,comp48247_c0_seq2_7,CL83116Contig1,CL63Contig7,CL37840Contig1,CL20215Contig2,CL52337Contig1,CL87791Contig1,CL55295Contig1,CL55504Contig1,CL6867Contig1,CL13887Contig1,CL88394Contig1,CL12782Contig2,CL89Contig6,CL8497Contig1,CL6838Contig1,CL42632Contig1,CL6867Contig2,CL2Contig1,CL83914Contig1,CL16134Contig1,CL44546Contig1,CL40675Contig2,comp66374_c0_seq4_6	5.38922	2.87857	1.87219
ko00941	Flavonoid biosynthesis	9	501	125	19732	0.00133484	0.0297478	CL45502Contig1,CL25650Contig1,CL59060Contig1,CL13818Contig1,CL55399Contig1,CL1575Contig3,CL42594Contig1,CL13039Contig1,CL29151Contig1	1.79641	0.633489	2.83574
ko01053	Biosynthesis of siderophore group nonribosomal peptides	1	501	3	19732	0.00189768	0.0361963	CL11180Contig1	0.199601	0.0152037	13.1284
ko00626	Naphthalene degradation	3	501	22	19732	0.00208825	0.0361963	CL10603Contig2,CL10603Contig1,CL2362Contig1	0.598802	0.111494	5.37071
ko04145	Phagosome	21	501	447	19732	0.00253774	0.0378728	comp65684_c0_seq3_5,CL13269Contig2,CL61434Contig1,CL59910Contig1,CL54171Contig1,CL20215Contig2,CL38466Contig2,CL40445Contig1,CL42476Contig1,CL88394Contig1,CL28272Contig1,CL35706Contig1,CL55958Contig1,CL65453Contig1,CL83914Contig1,CL16134Contig1,CL53969Contig1,CL33639Contig1,CL38950Contig1,CL41726Contig1,CL3332Contig3	4.19162	2.26536	1.85031
ko04015	Rap1 signaling pathway	11	501	184	19732	0.00267052	0.0378728	CL51531Contig1,CL37784Contig1,CL20215Contig2,CL35166Contig2,CL54240Contig1,CL87791Contig1,CL88394Contig1,CL78478Contig1,CL2Contig1,CL83914Contig1,CL16134Contig1	2.19561	0.932495	2.35455
ko00361	Chlorocyclohexane and chlorobenzene degradation	1	501	4	19732	0.00373151	0.0415797	CL47100Contig1	0.199601	0.0202716	9.84631
ko00364	Fluorobenzoate degradation	1	501	4	19732	0.00373151	0.0415797	CL47100Contig1	0.199601	0.0202716	9.84631
ko00623	Toluene degradation	1	501	4	19732	0.00373151	0.0415797	CL47100Contig1	0.199601	0.0202716	9.84631
ko00982	Drug metabolism - cytochrome P450	9	501	147	19732	0.00437283	0.0454774	CL10603Contig2,CL81399Contig1,CL83554Contig1,CL8Contig1,CL38475Contig1,CL10603Contig1,CL2362Contig1,CL41824Contig1,CL35857Contig1	1.79641	0.744983	2.41134
ko04510	Focal adhesion	10	501	174	19732	0.00499284	0.0478657	CL51531Contig1,CL11283Contig1,CL20215Contig2,CL87791Contig1,CL88394Contig1,CL2Contig1,CL83914Contig1,CL16134Contig1,CL3650Contig2,comp66374_c0_seq4_6	1.99601	0.881816	2.26352
ko04011	MAPK signaling pathway - yeast	11	501	200	19732	0.00521614	0.0478657	CL51531Contig1,CL40675Contig1,comp48247_c0_seq2_7,CL83116Contig1,CL63Contig7,CL87791Contig1,CL42632Contig1,CL2Contig1,CL6153Contig3,CL40675Contig2,comp66374_c0_seq4_6	2.19561	1.01358	2.16619
ko04014	Ras signaling pathway	14	501	284	19732	0.00625417	0.0538254	CL51531Contig1,CL52857Contig1,CL20215Contig2,CL35166Contig2,CL87791Contig1,CL35767Contig1,CL88394Contig1,CL78478Contig1,CL28272Contig1,CL42632Contig1,CL2Contig1,CL83914Contig1,CL16134Contig1,CL27899Contig2	2.79441	1.43929	1.94153
ko00980	Metabolism of xenobiotics by cytochrome P450	9	501	156	19732	0.00660619	0.0538254	CL10603Contig2,CL81399Contig1,CL83554Contig1,CL8Contig1,CL38475Contig1,CL10603Contig1,CL2362Contig1,CL41824Contig1,CL35857Contig1	1.79641	0.790594	2.27222
ko01040	Biosynthesis of unsaturated fatty acids	9	501	157	19732	0.00690069	0.0538254	CL19454Contig1,CL11947Contig2,CL55298Contig1,CL30720Contig1,CL54819Contig1,CL35425Contig1,CL15867Contig1,CL46960Contig1,CL53342Contig1	1.79641	0.795662	2.25775
